# Supplementary material for: PhaMMseqs: a new pipeline for constructing phage gene phamilies using MMseqs2
Source: PubMed Central journal article supplement (PMC9635663; doi:10.1093/g3journal/jkac233), 2022-09-26
Supplement: jkac233_supplementary_data.pdf [file jkac233_supplementary_data.pdf]

## SUPPLEMENTARY MATERIALS

### METHODS

#### *Identifying intein-containing genes*

Intein-containing genes were identified in the 89,208 non-redundant training genes by querying them with RPSBLAST (Camacho et al. 2009) against the NCBI's Conserved Domain Database (Marchler-Bauer et al. 2015) to find hits to any of the intein domains in that dataset: cd00081, cd00283, COG1372, pfam13403, pfam14623, pfam14890, TIGR01443, TIGR01445, smart00305, or smart00306. Hits with E-value better than 0.001 were retained and intein coordinates were recorded for each query as the minimum spanning coordinate range that covers all intein domain hits found within a single gene.

#### *Establishing similarity and coverage thresholds for pham evaluation*

To choose a similarity threshold for pham evaluation, training genes lacking significant (E-value  $\leq 0.001$ , no identity/coverage thresholds) non-self hits to the remaining training genes were globally aligned to each other in a pairwise fashion to mimic the alignment of random (unrelated) sequences. Alignment bitscores were length-normalized, and a histogram plotted to investigate the distribution of the resulting 18.9 million pairwise alignments. Most of these achieve negative length-normalized scores (Fig. S1A), and by manually examining alignments at the top of the distribution we identified the 0.5 half-bit per column threshold (roughly 20-30% identity, Fig. S1B) as separating random alignments from the rare high-quality alignments between sequences too short to achieve significant E-values.

To select a coverage threshold for pham assessment, tail assembly chaperones and intein-containing genes in the training set were closely examined. Tail assembly chaperones are found in all long-tailed dsDNA phages, typically as two proteins (gpG and gpGT) produced from a single locus by a -1 or -2 ribosomal frameshift (Xu et al. 2004), such that their N-termini are identical up to the frameshift. The two proteins serve related but distinct roles in promoting proper tail tube formation so ideally, they would be placed in separate phams. For the 1,164 training genomes with two overlapping tail assembly chaperones annotated, we plotted the gpG-to-gpGT length ratio as a cumulative distribution function (Fig. S1C) and determined that a 60% coverage threshold should separate most gpG/gpGT pairs.

Inteins are selfish mobile elements found within protein-coding genes, and which splice themselves out of the translated peptide leaving the original host protein intact (Raghavan and Minnick 2009). Unlike tail assembly chaperones, intein-containing genes are relatively rare in phages (only 201 of the 89,208 non-redundant training genes have Conserved Domain Database hits to intein domains) but are typically found in well-conserved genes with intein-free homologs in related phages. Because inteins excise themselves from the translated peptide leaving the original protein intact and presumably functionally unimpaired, intein-free and intein-containing homologs would ideally be placed in the same pham. Analysis of intein size relative to the length of their host gene reveals that in phages they typically make up less than 40% of the overall length of the gene (Fig. S1D), such that a 60% coverage threshold should allow assembly of phams whose members have differential intein presence.

## FIGURE LEGENDS

### **Figure S1. Factors used to choose false positive similarity and coverage thresholds for**

**parameter training.** (A) Genes from the training set with no all-versus-all BLASTP hits were globally aligned to each other (N=18.9 million alignments), and their length-normalized alignment bitscores plotted as a histogram.

(B) Pairs of genes indicated by BLASTP as potential global homologs (60% bi-directional coverage, E-value less than or equal to 0.001) were globally aligned (N=1.1 million alignments) and their length-normalized alignment bitscores plotted against their percent identity to analyze the relationship between identity and alignment score.

(C) The relationship between short (gpG) and long (gpGT) isoforms of tail assembly chaperones (N=1,164 chaperone pairs) was examined by dividing the length of each gpG by the length of its paired gpGT and plotting the results as a cumulative distribution function.

(D) The relationship between inteins and their host proteins (N=201 intein-containing genes) was examined by dividing the size of each putative intein by the overall length of the protein it is found in, also plotted as a cumulative distribution function.

## REFERENCES

- Camacho, C., G. Coulouris, V. Avagyan, N. Ma, J. Papadopoulos *et al.*, 2009 BLAST+: architecture and applications. *BMC Bioinformatics* 10:421.
- Marchler-Bauer, A., M.K. Derbyshire, N.R. Gonzales, S. Lu, F. Chitsaz *et al.*, 2015 CDD: NCBI's conserved domain database. *Nucleic Acids Res* 43 (Database issue):D222-226.
- Raghavan, R., and M.F. Minnick, 2009 Group I introns and inteins: disparate origins but convergent parasitic strategies. *J Bacteriol* 191 (20):6193-6202.
- Xu, J., R.W. Hendrix, and R.L. Duda, 2004 Conserved translational frameshift in dsDNA bacteriophage tail assembly genes. *Mol Cell* 16 (1):11-21.

**Table S1.** Metadata for the Actinobacteriophage genomes used to optimize MMseqs2 parameters.

| PhageID <sup>1</sup> | Accession <sup>2</sup> | Host Genus   | Cluster <sup>3</sup> | Length (bp) | # Genes | GC (%) |
|----------------------|------------------------|--------------|----------------------|-------------|---------|--------|
| phiAsp2              | NC_005885              | Actinoplanes | Singleton            | 58638       | 76      | 70.4   |
| Bennie               | KU160640               | Arthrobacter | AK                   | 43075       | 62      | 61.4   |
| Canowicakte          | MF140400               | Arthrobacter | AK                   | 43914       | 62      | 61.2   |
| Christian            | MF140404               | Arthrobacter | AK                   | 43081       | 61      | 60.7   |
| Daiboju              | MH450117               | Arthrobacter | AK                   | 43950       | 60      | 61.9   |
| Dino                 | MF140407               | Arthrobacter | AK                   | 43562       | 62      | 61.1   |
| DrRobert             | KU160643               | Arthrobacter | AK                   | 42601       | 59      | 60.6   |
| Fluke                | MG198781               | Arthrobacter | AK                   | 43812       | 62      | 60.9   |
| Glenn                | KU160645               | Arthrobacter | AK                   | 44389       | 64      | 60.8   |
| Greenhouse           | KX688103               | Arthrobacter | AK                   | 43977       | 61      | 60.8   |
| Herb                 | MH450118               | Arthrobacter | AK                   | 43949       | 60      | 61.9   |
| HunterDalle          | KU160648               | Arthrobacter | AK                   | 43336       | 60      | 61.6   |
| Huntingdon           | MG210949               | Arthrobacter | AK                   | 43891       | 61      | 60.7   |
| Immaculata           | KU160649               | Arthrobacter | AK                   | 43661       | 62      | 61.0   |
| Joann                | KU160652               | Arthrobacter | AK                   | 44183       | 63      | 60.7   |
| KingBob              | MH450121               | Arthrobacter | AK                   | 43950       | 60      | 61.9   |
| Korra                | KU160653               | Arthrobacter | AK                   | 43707       | 59      | 61.1   |
| Lucy                 | KX576641               | Arthrobacter | AK                   | 42944       | 60      | 60.7   |
| MeganNoll            | MG198782               | Arthrobacter | AK                   | 44258       | 63      | 60.9   |
| Moki                 | MH744421               | Arthrobacter | AK                   | 43161       | 62      | 61.3   |
| Nubia                | MF140424               | Arthrobacter | AK                   | 44045       | 61      | 60.7   |
| Oxyfrius             | KX688102               | Arthrobacter | AK                   | 44163       | 62      | 60.8   |
| PitaDog              | MF140425               | Arthrobacter | AK                   | 42963       | 61      | 60.7   |
| Preamble             | KU160659               | Arthrobacter | AK                   | 43374       | 64      | 60.7   |
| Pumancara            | KU160661               | Arthrobacter | AK                   | 42830       | 61      | 61.7   |
| RAP15                | KU160662               | Arthrobacter | AK                   | 44259       | 63      | 60.9   |
| RcigaStruga          | KX576640               | Arthrobacter | AK                   | 43891       | 62      | 60.7   |
| Sergei               | MH450131               | Arthrobacter | AK                   | 43950       | 60      | 61.9   |
| Suppi                | KX621004               | Arthrobacter | AK                   | 43914       | 62      | 61.2   |
| Temper16             | MF668285               | Arthrobacter | AK                   | 43950       | 60      | 61.9   |
| Urla                 | MG198779               | Arthrobacter | AK                   | 43940       | 62      | 61.2   |
| Vallejo              | KX621005               | Arthrobacter | AK                   | 43607       | 62      | 61.0   |
| Vulture              | KU160671               | Arthrobacter | AK                   | 43336       | 60      | 61.6   |
| Wayne                | KU160672               | Arthrobacter | AK                   | 44371       | 63      | 61.1   |
| Laroye               | KU160654               | Arthrobacter | AL                   | 60005       | 99      | 64.8   |
| LiSara               | MF140418               | Arthrobacter | AL                   | 60137       | 96      | 64.7   |
| Salgado              | KU160664               | Arthrobacter | AL                   | 59807       | 99      | 64.6   |
| Shrooms              | MF140427               | Arthrobacter | AL                   | 59707       | 98      | 64.5   |
| Waltz                | MG099950               | Arthrobacter | AL                   | 58499       | 96      | 64.3   |
| Wheelbite            | MF140434               | Arthrobacter | AL                   | 59879       | 94      | 64.8   |
| Arcadia              | MF189170               | Arthrobacter | AM                   | 58059       | 97      | 45.2   |
| Cheesy               | MF324906               | Arthrobacter | AM                   | 58739       | 101     | 45.2   |
| Circum               | KU160642               | Arthrobacter | AM                   | 58353       | 99      | 45.2   |
| Correa               | MF189171               | Arthrobacter | AM                   | 57401       | 96      | 45.2   |
| Elsa                 | MF189172               | Arthrobacter | AM                   | 58059       | 97      | 45.2   |

|              |          |              |     |       |     |      |
|--------------|----------|--------------|-----|-------|-----|------|
| Heisenberger | MF189173 | Arthrobacter | AM  | 58208 | 100 | 45.1 |
| KeaneyLin    | MH450120 | Arthrobacter | AM  | 57847 | 95  | 45.4 |
| Mudcat       | KU647628 | Arthrobacter | AM  | 59443 | 95  | 45.1 |
| Nason        | MF189174 | Arthrobacter | AM  | 58059 | 97  | 45.1 |
| Tribby       | MF189175 | Arthrobacter | AM  | 59084 | 102 | 45.2 |
| Azathoth     | MH576948 | Arthrobacter | AN  | 15556 | 26  | 60.1 |
| CGermain     | MH576950 | Arthrobacter | AN  | 15556 | 26  | 60.1 |
| Chestnut     | KY434670 | Arthrobacter | AN  | 15556 | 26  | 60.1 |
| Copper       | MH576951 | Arthrobacter | AN  | 15556 | 26  | 60.1 |
| Courtney3    | KX443695 | Arthrobacter | AN  | 15556 | 26  | 60.1 |
| Decurro      | KT355471 | Arthrobacter | AN  | 15524 | 26  | 60.2 |
| Dewayne      | MH576952 | Arthrobacter | AN  | 15556 | 26  | 60.1 |
| Elkhorn      | MF140409 | Arthrobacter | AN  | 15556 | 26  | 59.6 |
| Guntur       | MH779506 | Arthrobacter | AN  | 15556 | 26  | 60.1 |
| Hunnie       | MH576955 | Arthrobacter | AN  | 15556 | 26  | 60.1 |
| Inspire2     | MH576957 | Arthrobacter | AN  | 15556 | 26  | 60.1 |
| Jessica      | KT355473 | Arthrobacter | AN  | 15556 | 26  | 60.1 |
| KylieMac     | MF140415 | Arthrobacter | AN  | 15540 | 27  | 59.8 |
| Link         | MF140417 | Arthrobacter | AN  | 15521 | 26  | 60.2 |
| Lore         | MF140419 | Arthrobacter | AN  | 15556 | 26  | 59.6 |
| Maggie       | KU160655 | Arthrobacter | AN  | 15556 | 26  | 60.1 |
| Mariposa     | MF140420 | Arthrobacter | AN  | 15556 | 26  | 60.1 |
| Massimo      | KX576642 | Arthrobacter | AN  | 15556 | 26  | 60.1 |
| Moloch       | KU160657 | Arthrobacter | AN  | 15630 | 26  | 60.0 |
| Muttie       | KU160658 | Arthrobacter | AN  | 15524 | 26  | 60.2 |
| Prospero     | KX610765 | Arthrobacter | AN  | 15556 | 26  | 60.1 |
| Ronnie       | MH576961 | Arthrobacter | AN  | 15556 | 26  | 60.1 |
| Sandman      | KT355475 | Arthrobacter | AN  | 15630 | 26  | 60.0 |
| Seume        | MF140426 | Arthrobacter | AN  | 15319 | 26  | 60.3 |
| Stratus      | KU160667 | Arthrobacter | AN  | 15630 | 26  | 60.0 |
| Swenson      | MF140429 | Arthrobacter | AN  | 15680 | 26  | 59.9 |
| Taj14        | MF140431 | Arthrobacter | AN  | 15546 | 26  | 59.9 |
| TinoCrisci   | MF140433 | Arthrobacter | AN  | 15556 | 26  | 60.1 |
| Toulouse     | KU160670 | Arthrobacter | AN  | 15319 | 25  | 60.3 |
| TymAbreu     | KT783672 | Arthrobacter | AN  | 15556 | 26  | 60.1 |
| Yank         | KU160674 | Arthrobacter | AN  | 15524 | 26  | 60.2 |
| Beans        | MF324907 | Arthrobacter | AO1 | 49797 | 73  | 63.6 |
| Brent        | KT365401 | Arthrobacter | AO1 | 49879 | 74  | 63.4 |
| Franzy       | MF377442 | Arthrobacter | AO1 | 49976 | 72  | 63.3 |
| Jawnski      | KU160651 | Arthrobacter | AO1 | 49419 | 73  | 63.4 |
| Piccoletto   | MF189177 | Arthrobacter | AO1 | 49808 | 74  | 63.6 |
| BarretLemon  | KU647629 | Arthrobacter | AO2 | 51290 | 79  | 60.9 |
| Jordan       | MF189176 | Arthrobacter | AO2 | 51347 | 78  | 61.1 |
| LeeroyJ      | MH825703 | Arthrobacter | AO2 | 51025 | 79  | 60.9 |
| Martha       | KU160656 | Arthrobacter | AO2 | 51027 | 77  | 61.0 |
| Shade        | MF189178 | Arthrobacter | AO2 | 50930 | 77  | 61.1 |
| Sonny        | KU160665 | Arthrobacter | AO2 | 50909 | 77  | 61.1 |
| TaeYoung     | KU160668 | Arthrobacter | AO2 | 50999 | 78  | 61.0 |
| Timinator    | MF377441 | Arthrobacter | AO2 | 51138 | 79  | 60.9 |

|               |           |              |     |       |     |      |
|---------------|-----------|--------------|-----|-------|-----|------|
| Tank          | KU160669  | Arthrobacter | AP  | 67592 | 105 | 62.9 |
| Wilde         | KU160673  | Arthrobacter | AP  | 68203 | 109 | 62.9 |
| Amigo         | KU160638  | Arthrobacter | AQ  | 59173 | 86  | 52.9 |
| Anansi        | KU160639  | Arthrobacter | AQ  | 58848 | 86  | 53.0 |
| Gorgeous      | KU160647  | Arthrobacter | AQ  | 58979 | 86  | 53.0 |
| Molivia       | MF185731  | Arthrobacter | AQ  | 58247 | 92  | 53.5 |
| Rings         | KU160663  | Arthrobacter | AQ  | 59167 | 87  | 53.0 |
| SorJuana      | KU160666  | Arthrobacter | AQ  | 58979 | 86  | 53.0 |
| ArV1          | NC_026606 | Arthrobacter | AR  | 71200 | 99  | 61.6 |
| Chocolat      | KX670787  | Arthrobacter | AR  | 69798 | 111 | 61.7 |
| Chubster      | KX670786  | Arthrobacter | AR  | 70258 | 112 | 61.7 |
| Colucci       | MF185718  | Arthrobacter | AR  | 70707 | 114 | 61.7 |
| Conboy        | KX522650  | Arthrobacter | AR  | 70096 | 111 | 61.7 |
| EdgarPoe      | KX855961  | Arthrobacter | AR  | 70176 | 111 | 61.6 |
| HumptyDumpty  | KX855962  | Arthrobacter | AR  | 69978 | 111 | 61.7 |
| JayCookie     | MF668274  | Arthrobacter | AR  | 70362 | 112 | 61.7 |
| Kabreeze      | MF185721  | Arthrobacter | AR  | 70035 | 111 | 61.7 |
| KBurrousTX    | MH744419  | Arthrobacter | AR  | 71020 | 107 | 62.3 |
| PrincessTrina | KU160660  | Arthrobacter | AR  | 70265 | 112 | 61.6 |
| RosiePosie    | MF185723  | Arthrobacter | AR  | 70396 | 112 | 61.7 |
| Scavito       | MF185724  | Arthrobacter | AR  | 70123 | 112 | 61.6 |
| Tophat        | MF185725  | Arthrobacter | AR  | 70091 | 111 | 61.6 |
| Abidatro      | MF140397  | Arthrobacter | AS1 | 39122 | 66  | 68.5 |
| Galaxy        | KU160644  | Arthrobacter | AS1 | 37809 | 65  | 68.4 |
| Coral         | MH834606  | Arthrobacter | AS2 | 38317 | 72  | 66.7 |
| Cote          | MH834608  | Arthrobacter | AS2 | 39044 | 75  | 66.7 |
| Daob          | MH834609  | Arthrobacter | AS2 | 37967 | 71  | 66.6 |
| Kepler        | MH834616  | Arthrobacter | AS2 | 38449 | 75  | 66.7 |
| Lunar         | MH834618  | Arthrobacter | AS2 | 38450 | 73  | 66.7 |
| Melons        | MH834620  | Arthrobacter | AS2 | 38457 | 73  | 66.8 |
| Polka         | MH834624  | Arthrobacter | AS2 | 38077 | 71  | 66.7 |
| Andrew        | MH834595  | Arthrobacter | AS3 | 38802 | 71  | 65.5 |
| Kellezio      | KU647626  | Arthrobacter | AT  | 58871 | 98  | 63.3 |
| Kitkat        | KU647627  | Arthrobacter | AT  | 58560 | 100 | 63.4 |
| Breylor17     | MH450115  | Arthrobacter | AU1 | 57822 | 84  | 49.9 |
| CapnMurica    | KU160641  | Arthrobacter | AU1 | 58159 | 88  | 49.6 |
| Caterpillar   | MF140401  | Arthrobacter | AU1 | 56622 | 86  | 51.1 |
| ElephantMan   | MF038791  | Arthrobacter | AU1 | 58405 | 93  | 49.9 |
| Gordon        | KU160646  | Arthrobacter | AU1 | 58279 | 89  | 49.8 |
| MediumFry     | MH450125  | Arthrobacter | AU1 | 56978 | 85  | 50.9 |
| Nightmare     | MF140423  | Arthrobacter | AU1 | 58839 | 92  | 49.9 |
| Niktson       | MF038790  | Arthrobacter | AU1 | 58405 | 93  | 49.9 |
| Synopsis      | MH479926  | Arthrobacter | AU1 | 57542 | 84  | 49.9 |
| Tatanka       | MH399789  | Arthrobacter | AU1 | 58120 | 85  | 50.0 |
| Teacup        | MF140432  | Arthrobacter | AU1 | 58238 | 88  | 49.8 |
| Tenno         | MH825711  | Arthrobacter | AU1 | 58193 | 92  | 49.6 |
| Adat          | MF668266  | Arthrobacter | AV  | 45428 | 56  | 45.7 |
| Brad          | MH450114  | Arthrobacter | AV  | 45418 | 56  | 45.7 |
| GurgleFerb    | MF668273  | Arthrobacter | AV  | 45426 | 56  | 45.7 |

|              |           |                 |           |       |     |      |
|--------------|-----------|-----------------|-----------|-------|-----|------|
| Jasmine      | KU160650  | Arthrobacter    | AV        | 46723 | 57  | 45.9 |
| Nellie       | MF668279  | Arthrobacter    | AV        | 45428 | 57  | 45.8 |
| Adaia        | MH834594  | Arthrobacter    | AX        | 15840 | 28  | 56.1 |
| Atraxa       | MH834597  | Arthrobacter    | AX        | 14927 | 23  | 58.0 |
| Sputnik      | MH834628  | Arthrobacter    | AX        | 14927 | 23  | 58.0 |
| Auxilium     | MH834598  | Arthrobacter    | AY        | 49447 | 92  | 62.6 |
| Faja         | MH834612  | Arthrobacter    | AY        | 52490 | 95  | 63.1 |
| Richie       | MH834625  | Arthrobacter    | AY        | 53867 | 98  | 62.7 |
| DrManhattan  | MH834610  | Arthrobacter    | AZ        | 42577 | 72  | 66.0 |
| Liebe        | MK061413  | Arthrobacter    | AZ        | 45803 | 69  | 68.8 |
| Maureen      | MH834619  | Arthrobacter    | AZ        | 45802 | 69  | 68.8 |
| Yang         | MH834629  | Arthrobacter    | AZ        | 43206 | 68  | 68.4 |
| Bridgette    | MH834603  | Arthrobacter    | FA        | 43113 | 71  | 65.1 |
| Constance    | MH834605  | Arthrobacter    | FA        | 43706 | 70  | 65.1 |
| Eileen       | MH834611  | Arthrobacter    | FA        | 41165 | 63  | 65.1 |
| Judy         | MH834614  | Arthrobacter    | FA        | 43440 | 72  | 65.2 |
| Peas         | MH834623  | Arthrobacter    | FA        | 44103 | 68  | 64.7 |
| Corgi        | MH834607  | Arthrobacter    | FE        | 15771 | 26  | 67.6 |
| Noely        | MH834622  | Arthrobacter    | FE        | 15013 | 23  | 68.3 |
| Nandita      | MH834621  | Arthrobacter    | FF        | 42378 | 66  | 64.9 |
| Ryan         | MH834627  | Arthrobacter    | FF        | 43182 | 70  | 65.1 |
| ArV2         | NC_022972 | Arthrobacter    | Singleton | 37372 | 68  | 62.7 |
| MargaretKali | MH450123  | Arthrobacter    | Singleton | 39448 | 72  | 61.1 |
| LuckyBarnes  | MF668275  | Brevibacterium  | Singleton | 50774 | 67  | 61.9 |
| CMP1         | NC_013698 | Clavibacter     | Singleton | 58652 | 74  | 57.0 |
| CN1A         | NC_023549 | Clavibacter     | Singleton | 56789 | 78  | 62.1 |
| C3PO         | MG198776  | Corynebacterium | EN        | 67383 | 93  | 52.3 |
| Darwin       | MG198777  | Corynebacterium | EN        | 67743 | 94  | 52.1 |
| PotatoChip   | MG198778  | Corynebacterium | EN        | 66359 | 92  | 52.3 |
| Zion         | MG198780  | Corynebacterium | EN        | 66392 | 92  | 52.3 |
| Poushou      | MF197383  | Corynebacterium | EO        | 40353 | 54  | 60.0 |
| TouchMeNot   | MH271317  | Corynebacterium | EO        | 40526 | 54  | 60.0 |
| SamW         | MH727560  | Corynebacterium | EP        | 44609 | 60  | 68.1 |
| BFK20        | AJ278322  | Corynebacterium | Singleton | 42972 | 54  | 56.2 |
| Juicebox     | MH727550  | Corynebacterium | Singleton | 41394 | 59  | 67.9 |
| P1201        | NC_009816 | Corynebacterium | Singleton | 70579 | 97  | 50.9 |
| JSwag        | KX557280  | Gordonia        | A15       | 52726 | 101 | 61.9 |
| KatherineG   | KU998251  | Gordonia        | A15       | 52689 | 98  | 61.9 |
| LastResort   | MH513974  | Gordonia        | A15       | 52619 | 97  | 62.0 |
| Nedarya      | MH316566  | Gordonia        | A15       | 53140 | 97  | 62.0 |
| Remus        | KX557283  | Gordonia        | A15       | 52738 | 98  | 62.0 |
| Rosalind     | KU998250  | Gordonia        | A15       | 52684 | 99  | 61.9 |
| ShayRa       | MF668282  | Gordonia        | A15       | 51238 | 97  | 62.1 |
| Soups        | KU998249  | Gordonia        | A15       | 52924 | 99  | 61.9 |
| Strosahl     | KX557284  | Gordonia        | A15       | 52738 | 98  | 62.0 |
| Waits        | MH001454  | Gordonia        | A15       | 52856 | 98  | 62.0 |
| Gustav       | MG198784  | Gordonia        | CD        | 44408 | 69  | 67.9 |
| Mahdia       | MG198783  | Gordonia        | CD        | 42475 | 61  | 67.2 |
| Morrissey    | MH271305  | Gordonia        | CD        | 44924 | 66  | 65.8 |



|               |           |          |     |       |     |      |
|---------------|-----------|----------|-----|-------|-----|------|
| Trine         | MH271318  | Gordonia | CD  | 43758 | 66  | 67.8 |
| Bachita       | KU998247  | Gordonia | CQ1 | 93843 | 182 | 61.9 |
| ClubL         | KU998246  | Gordonia | CQ1 | 92618 | 179 | 61.9 |
| Cucurbita     | KX557276  | Gordonia | CQ1 | 93686 | 178 | 62.0 |
| Lozinak       | MF919520  | Gordonia | CQ1 | 93201 | 179 | 61.9 |
| Smoothie      | KU998244  | Gordonia | CQ1 | 93139 | 179 | 61.9 |
| Toniann       | MF919537  | Gordonia | CQ1 | 92546 | 179 | 61.9 |
| OneUp         | KU998245  | Gordonia | CQ2 | 93577 | 163 | 61.5 |
| Flapper       | MG757157  | Gordonia | CR1 | 67527 | 96  | 65.3 |
| GRU1          | JF923797  | Gordonia | CR1 | 65766 | 94  | 65.5 |
| GTE5          | JF923796  | Gordonia | CR1 | 65839 | 92  | 65.1 |
| Turuncu       | MH744424  | Gordonia | CR1 | 66808 | 94  | 65.4 |
| Buggaboo      | MH779499  | Gordonia | CR2 | 68626 | 94  | 65.6 |
| Emianna       | MH779501  | Gordonia | CR2 | 68190 | 95  | 65.8 |
| Foxboro       | MH727547  | Gordonia | CR2 | 67773 | 92  | 65.8 |
| GTE8          | KR053201  | Gordonia | CR2 | 67617 | 94  | 66.0 |
| Jifall16      | MH779508  | Gordonia | CR2 | 67470 | 93  | 65.8 |
| Kabluna       | MF919510  | Gordonia | CR2 | 65869 | 95  | 65.6 |
| KidneyBean    | MH727552  | Gordonia | CR2 | 67802 | 92  | 65.8 |
| Kurt          | MH779510  | Gordonia | CR2 | 68205 | 95  | 65.8 |
| NatB6         | MH536824  | Gordonia | CR2 | 67081 | 93  | 65.7 |
| SuperSulley   | MG757166  | Gordonia | CR2 | 64124 | 86  | 65.4 |
| Patio         | MF919542  | Gordonia | CR3 | 66251 | 90  | 65.6 |
| Skysand       | MH669013  | Gordonia | CR3 | 67359 | 95  | 65.5 |
| Marietta      | MH669007  | Gordonia | CR4 | 64370 | 91  | 66.1 |
| Fury          | MH536819  | Gordonia | CR5 | 64104 | 96  | 65.2 |
| Pleakley      | MH576960  | Gordonia | CR5 | 64105 | 96  | 65.2 |
| GMA7          | KR063278  | Gordonia | CS1 | 73419 | 101 | 56.6 |
| GTE7          | JN035618  | Gordonia | CS1 | 74431 | 103 | 56.8 |
| Adgers        | MG757152  | Gordonia | CS2 | 76008 | 108 | 59.0 |
| BirksAndSocks | MG099940  | Gordonia | CS2 | 77354 | 110 | 58.9 |
| Boneham       | MG757155  | Gordonia | CS2 | 77497 | 109 | 58.9 |
| Flakey        | MG770211  | Gordonia | CS2 | 76889 | 107 | 58.9 |
| Hotorobo      | KU963245  | Gordonia | CS2 | 76972 | 108 | 58.9 |
| Monty         | KU998241  | Gordonia | CS2 | 75680 | 105 | 58.9 |
| SteveFrench   | MG770214  | Gordonia | CS2 | 75687 | 103 | 59.2 |
| Anamika       | MG099935  | Gordonia | CS3 | 73851 | 92  | 59.2 |
| Hail2Pitt     | MH025889  | Gordonia | CS3 | 73659 | 91  | 59.1 |
| Woes          | KU998240  | Gordonia | CS3 | 73752 | 91  | 59.1 |
| Benczkowski14 | KU963262  | Gordonia | CS4 | 75380 | 99  | 59.5 |
| Demosthenes   | KU998242  | Gordonia | CS4 | 74073 | 95  | 59.3 |
| Katyusha      | KU963258  | Gordonia | CS4 | 75380 | 99  | 59.5 |
| Kvothe        | KU998243  | Gordonia | CS4 | 75462 | 99  | 59.5 |
| Teatealatte   | MH576976  | Gordonia | CS4 | 75345 | 100 | 59.6 |
| Cozz          | KU998239  | Gordonia | CT  | 46600 | 68  | 60.0 |
| Emalyn        | KU963260  | Gordonia | CT  | 43982 | 67  | 61.2 |
| GTE2          | NC_015720 | Gordonia | CT  | 45530 | 57  | 60.3 |
| Margaret      | MH271302  | Gordonia | CT  | 46950 | 75  | 62.8 |
| SketchMex     | MH450132  | Gordonia | CT  | 45847 | 67  | 60.5 |

|               |          |          |     |       |     |      |
|---------------|----------|----------|-----|-------|-----|------|
| Troje         | MG770215 | Gordonia | CT  | 45909 | 71  | 60.4 |
| DinoDaryn     | KY471269 | Gordonia | CU1 | 44936 | 82  | 66.2 |
| Huffy         | KY471268 | Gordonia | CU1 | 44936 | 82  | 66.2 |
| Splinter      | KU998238 | Gordonia | CU1 | 45858 | 79  | 66.1 |
| Vendetta      | KU998237 | Gordonia | CU1 | 45858 | 79  | 66.1 |
| Gsput1        | KP790011 | Gordonia | CU2 | 43505 | 71  | 62.8 |
| Schmidt       | MH651189 | Gordonia | CU4 | 43099 | 76  | 65.7 |
| Blueberry     | KU998236 | Gordonia | CV  | 54990 | 86  | 67.0 |
| CaptainKirk2  | KX557274 | Gordonia | CV  | 47898 | 79  | 67.4 |
| CarolAnn      | KX557275 | Gordonia | CV  | 54167 | 80  | 66.9 |
| Fenry         | MH020241 | Gordonia | CV  | 49965 | 78  | 67.2 |
| Frokostdame   | MH536818 | Gordonia | CV  | 52531 | 84  | 66.9 |
| Guacamole     | KU963259 | Gordonia | CV  | 49894 | 78  | 67.2 |
| Lysidious     | MF919521 | Gordonia | CV  | 50948 | 83  | 67.0 |
| Oblivate      | KU963254 | Gordonia | CV  | 49286 | 80  | 67.5 |
| Petra         | MH153808 | Gordonia | CV  | 52304 | 89  | 67.1 |
| UmaThurman    | KU963251 | Gordonia | CV  | 50127 | 83  | 67.0 |
| Utz           | KU998248 | Gordonia | CV  | 49768 | 71  | 67.7 |
| Zarbodnamra   | MH576969 | Gordonia | CV  | 49729 | 84  | 67.3 |
| Jeanie        | KU998256 | Gordonia | CW1 | 17118 | 27  | 68.6 |
| McGonagall    | KU998255 | Gordonia | CW1 | 17119 | 27  | 68.6 |
| GMA5          | KR053198 | Gordonia | CW2 | 17562 | 28  | 66.4 |
| GRU3          | KR053197 | Gordonia | CW2 | 17727 | 26  | 66.5 |
| Kampe         | KU998254 | Gordonia | CX  | 80649 | 115 | 47.0 |
| Orchid        | KU998253 | Gordonia | CX  | 80650 | 114 | 47.0 |
| PatrickStar   | KU998252 | Gordonia | CX  | 80729 | 115 | 47.0 |
| RobinSparkles | MH479923 | Gordonia | CX  | 81834 | 124 | 46.9 |
| Angelique     | MH651167 | Gordonia | CY1 | 50970 | 76  | 66.6 |
| Confidence    | MG872834 | Gordonia | CY1 | 50646 | 79  | 66.4 |
| Pollux        | MH513979 | Gordonia | CY1 | 52488 | 82  | 66.8 |
| BritBrat      | KU998233 | Gordonia | CY2 | 55524 | 98  | 65.0 |
| BatStarr      | KX557273 | Gordonia | CZ1 | 53432 | 83  | 66.6 |
| Eviarto       | MH479912 | Gordonia | CZ1 | 53407 | 84  | 66.5 |
| Kita          | KU963257 | Gordonia | CZ1 | 50346 | 80  | 66.7 |
| Nymphadora    | KU963255 | Gordonia | CZ1 | 53431 | 84  | 66.6 |
| TimTam        | MH479927 | Gordonia | CZ1 | 53431 | 84  | 66.6 |
| Zirinka       | KX557287 | Gordonia | CZ1 | 52077 | 79  | 66.7 |
| Attis         | KU963247 | Gordonia | CZ2 | 47881 | 74  | 66.8 |
| Bjanes7       | MG099941 | Gordonia | CZ2 | 46042 | 72  | 66.6 |
| Ebert         | MH271295 | Gordonia | CZ2 | 46653 | 78  | 66.6 |
| SoilAssassin  | KU963246 | Gordonia | CZ2 | 47880 | 74  | 66.8 |
| BaxterFox     | KU963263 | Gordonia | CZ3 | 53717 | 86  | 66.5 |
| Yeezy         | KU963249 | Gordonia | CZ3 | 51884 | 86  | 66.7 |
| Beenie        | MG845393 | Gordonia | CZ4 | 47953 | 73  | 66.3 |
| Easley        | MH155867 | Gordonia | CZ4 | 46717 | 77  | 66.6 |
| Howe          | KU252585 | Gordonia | CZ4 | 53182 | 80  | 65.6 |
| Bowser        | KU998235 | Gordonia | DB  | 46570 | 67  | 67.1 |
| GEazy         | MH479915 | Gordonia | DB  | 46728 | 73  | 66.9 |
| Hedwig        | KX557279 | Gordonia | DB  | 44536 | 70  | 67.2 |

|                |          |          |           |        |     |      |
|----------------|----------|----------|-----------|--------|-----|------|
| Schwabeltier   | KU963252 | Gordonia | DB        | 46895  | 71  | 67.0 |
| Danyall        | MH479910 | Gordonia | DC        | 58695  | 95  | 67.8 |
| KimmyK         | MH479917 | Gordonia | DC        | 58755  | 92  | 67.8 |
| TillyBobJoe    | MH669015 | Gordonia | DC        | 58677  | 93  | 67.8 |
| Twister6       | KX557286 | Gordonia | DC        | 57804  | 93  | 67.7 |
| Wizard         | KU998234 | Gordonia | DC        | 58308  | 89  | 67.9 |
| Angelicage     | MH651166 | Gordonia | DE1       | 59215  | 84  | 67.4 |
| Ashertheman    | MH651168 | Gordonia | DE1       | 57555  | 85  | 68.0 |
| Brandonk123    | MG812487 | Gordonia | DE1       | 58842  | 89  | 67.3 |
| Lennon         | MF919514 | Gordonia | DE1       | 60237  | 85  | 67.4 |
| Ribeye         | MH450129 | Gordonia | DE1       | 57448  | 85  | 68.1 |
| Rofo           | MH479924 | Gordonia | DE1       | 58767  | 85  | 67.3 |
| Sitar          | MH153809 | Gordonia | DE1       | 59641  | 84  | 67.3 |
| Vivi2          | KU963250 | Gordonia | DE1       | 59337  | 89  | 67.1 |
| Ali17          | MH669000 | Gordonia | DE2       | 58301  | 84  | 68.4 |
| Phinally       | KU963253 | Gordonia | DE2       | 59265  | 87  | 68.4 |
| GTE6           | KR053200 | Gordonia | DE3       | 56982  | 86  | 67.8 |
| Gmala1         | KP790009 | Gordonia | DF1       | 75167  | 90  | 50.8 |
| GordDuk1       | KP790010 | Gordonia | DF1       | 76276  | 97  | 50.7 |
| GordTnk2       | KP790008 | Gordonia | DF1       | 75987  | 98  | 50.7 |
| GMA3           | KR063279 | Gordonia | DF2       | 77779  | 104 | 51.3 |
| Jumbo          | KX557281 | Gordonia | DF3       | 78302  | 102 | 54.5 |
| Beyoncage      | MH576972 | Gordonia | DG        | 66610  | 96  | 59.6 |
| Djokovic       | MH025890 | Gordonia | DG        | 66609  | 96  | 59.6 |
| Suzy           | MH271313 | Gordonia | DG        | 67118  | 96  | 59.1 |
| Terapin        | KX557285 | Gordonia | DG        | 66611  | 97  | 59.6 |
| Lucky10        | KU963256 | Gordonia | DH        | 42979  | 70  | 65.4 |
| BetterKatz     | KU963261 | Gordonia | DI        | 50636  | 75  | 67.1 |
| DelRio         | MH509446 | Gordonia | DI        | 50961  | 75  | 67.0 |
| Nadeem         | MH399781 | Gordonia | DI        | 49897  | 74  | 67.3 |
| Gravy          | MG962368 | Gordonia | DJ        | 59545  | 93  | 51.1 |
| Kerry          | MG962369 | Gordonia | DJ        | 59608  | 93  | 51.1 |
| Bantam         | KX557272 | Gordonia | DL        | 92580  | 168 | 64.7 |
| Daredevil      | MH590603 | Gordonia | DL        | 90490  | 165 | 64.8 |
| Emperor        | MH271296 | Gordonia | DM        | 16604  | 24  | 70.1 |
| SallySpecial   | MG812496 | Gordonia | DM        | 15896  | 21  | 70.1 |
| BENtherdunthat | MG099939 | Gordonia | DN1       | 54867  | 102 | 63.4 |
| Getalong       | MH779504 | Gordonia | DN1       | 56214  | 104 | 62.8 |
| Horus          | MH651176 | Gordonia | DN1       | 55668  | 103 | 63.0 |
| Phistory       | MH651185 | Gordonia | DN1       | 53085  | 106 | 63.0 |
| Apricot        | MH536812 | Gordonia | DN3       | 52195  | 101 | 63.1 |
| Fryberger      | MH479913 | Gordonia | DP        | 67234  | 144 | 50.2 |
| Ronaldo        | MH479925 | Gordonia | DP        | 68389  | 147 | 50.2 |
| GMA6           | KR063280 | Gordonia | DQ        | 83324  | 115 | 58.2 |
| Sour           | MH153810 | Gordonia | DR        | 61670  | 79  | 68.0 |
| GMA2           | KR063281 | Gordonia | DS        | 103424 | 126 | 53.4 |
| Nyceirae       | KX557282 | Gordonia | DT        | 41857  | 60  | 67.5 |
| Neville        | MH651182 | Gordonia | DU        | 75813  | 129 | 58.8 |
| Catfish        | MH697580 | Gordonia | Singleton | 46888  | 78  | 65.0 |

|             |          |                |           |       |     |      |
|-------------|----------|----------------|-----------|-------|-----|------|
| Eyre        | KX557277 | Gordonia       | Singleton | 44929 | 74  | 67.5 |
| GAL1        | KR053194 | Gordonia       | Singleton | 49979 | 82  | 63.5 |
| Ghobes      | KX557278 | Gordonia       | Singleton | 45285 | 59  | 65.2 |
| GMA1        | KR053195 | Gordonia       | Singleton | 41207 | 68  | 65.7 |
| GMA4        | KR053199 | Gordonia       | Singleton | 45537 | 68  | 66.4 |
| Ruthy       | MH536826 | Gordonia       | Singleton | 51265 | 73  | 66.7 |
| Yvonnestic  | KU963248 | Gordonia       | Singleton | 98136 | 198 | 59.7 |
| AlexAdler   | MG962360 | Microbacterium | EA1       | 41834 | 63  | 63.4 |
| Antoinette  | MH045565 | Microbacterium | EA1       | 41858 | 63  | 63.4 |
| Aubergine   | MG839015 | Microbacterium | EA1       | 41555 | 62  | 63.4 |
| AxiPup      | MG839016 | Microbacterium | EA1       | 41770 | 63  | 63.3 |
| Baines      | MG839017 | Microbacterium | EA1       | 41555 | 62  | 63.4 |
| Balsa       | MG839030 | Microbacterium | EA1       | 41862 | 62  | 63.4 |
| Bandik      | MH045554 | Microbacterium | EA1       | 41804 | 63  | 63.5 |
| BeeBee8     | MH045555 | Microbacterium | EA1       | 42027 | 65  | 63.3 |
| Bonino      | MG920061 | Microbacterium | EA1       | 41534 | 62  | 63.4 |
| Dave        | MH045558 | Microbacterium | EA1       | 41858 | 63  | 63.4 |
| Espinosa    | MG839018 | Microbacterium | EA1       | 41553 | 62  | 63.4 |
| Etna        | MH045559 | Microbacterium | EA1       | 41908 | 64  | 63.4 |
| Gargoyle    | MH153802 | Microbacterium | EA1       | 41803 | 63  | 63.5 |
| Gelo        | MG962367 | Microbacterium | EA1       | 41562 | 62  | 63.4 |
| Hamlet      | MG839019 | Microbacterium | EA1       | 41934 | 63  | 63.4 |
| Ilzat       | MG839029 | Microbacterium | EA1       | 41525 | 62  | 63.5 |
| Kale        | MG839020 | Microbacterium | EA1       | 41558 | 62  | 63.4 |
| Knox        | MG839021 | Microbacterium | EA1       | 41797 | 63  | 63.3 |
| Ludgate     | MG839022 | Microbacterium | EA1       | 41799 | 63  | 63.5 |
| Martin      | MH153805 | Microbacterium | EA1       | 41812 | 63  | 63.5 |
| Nagem       | MH045560 | Microbacterium | EA1       | 41846 | 63  | 63.5 |
| Nattles     | MG925352 | Microbacterium | EA1       | 41544 | 62  | 63.4 |
| Oats        | MH153806 | Microbacterium | EA1       | 41555 | 62  | 63.4 |
| Papafritta  | MH513981 | Microbacterium | EA1       | 41573 | 62  | 63.4 |
| Peep        | MG839023 | Microbacterium | EA1       | 41856 | 63  | 63.4 |
| Peppino     | MG839024 | Microbacterium | EA1       | 41932 | 63  | 63.3 |
| PuppyEggo   | MG944219 | Microbacterium | EA1       | 41803 | 63  | 63.3 |
| Raccoon     | MG839025 | Microbacterium | EA1       | 41894 | 63  | 63.4 |
| Raptor      | MH045562 | Microbacterium | EA1       | 41801 | 63  | 63.4 |
| Redfield    | MH479922 | Microbacterium | EA1       | 41930 | 63  | 63.3 |
| Robinson    | MH045563 | Microbacterium | EA1       | 41874 | 63  | 63.5 |
| Schnapsidee | MH590590 | Microbacterium | EA1       | 41872 | 63  | 63.4 |
| StingRay    | MG944222 | Microbacterium | EA1       | 41597 | 62  | 63.5 |
| Superfresh  | MG839026 | Microbacterium | EA1       | 41860 | 63  | 63.4 |
| Teagan      | MH153811 | Microbacterium | EA1       | 41793 | 63  | 63.5 |
| TeddyBear   | MH045564 | Microbacterium | EA1       | 41555 | 62  | 63.4 |
| Tenda       | MG839028 | Microbacterium | EA1       | 41553 | 62  | 63.4 |
| Andromedas  | MH590606 | Microbacterium | EA2       | 40494 | 63  | 62.0 |
| ColaCorta   | MH590604 | Microbacterium | EA2       | 40494 | 63  | 62.0 |
| Eleri       | MG839027 | Microbacterium | EA2       | 40366 | 63  | 62.0 |
| Sansa       | MH513982 | Microbacterium | EA2       | 40306 | 61  | 61.8 |
| Casey       | MG944226 | Microbacterium | EA3       | 39307 | 59  | 61.3 |

|               |          |                |     |       |     |      |
|---------------|----------|----------------|-----|-------|-----|------|
| Pajaza        | MG944216 | Microbacterium | EA3 | 39307 | 59  | 61.2 |
| Pikmin        | MG944218 | Microbacterium | EA3 | 39307 | 59  | 61.3 |
| Golden        | MG925343 | Microbacterium | EA4 | 39640 | 58  | 64.1 |
| Koji          | MG925345 | Microbacterium | EA4 | 39403 | 56  | 64.2 |
| Lucky3        | MG925347 | Microbacterium | EA4 | 39640 | 58  | 64.1 |
| Neferthena    | MH697589 | Microbacterium | EA5 | 41706 | 62  | 64.4 |
| Armstrong     | MH834596 | Microbacterium | EB  | 39928 | 68  | 67.1 |
| Bernstein     | MH834599 | Microbacterium | EB  | 39926 | 68  | 67.1 |
| Brahms        | MH834602 | Microbacterium | EB  | 39828 | 68  | 67.1 |
| Coltrane      | MH834604 | Microbacterium | EB  | 39828 | 68  | 67.1 |
| Didgeridoo    | MH045566 | Microbacterium | EB  | 42655 | 75  | 66.1 |
| Dismas        | MG670586 | Microbacterium | EB  | 41593 | 66  | 69.6 |
| Eden          | MH509447 | Microbacterium | EB  | 40833 | 69  | 66.3 |
| Elva          | MH045567 | Microbacterium | EB  | 42139 | 71  | 68.2 |
| Kieran        | MH045568 | Microbacterium | EB  | 41417 | 63  | 69.7 |
| Rollins       | MH834626 | Microbacterium | EB  | 39926 | 68  | 67.1 |
| KaiHaiDragon  | MH590600 | Microbacterium | EC  | 52992 | 91  | 68.9 |
| Metamorphoo   | MH271304 | Microbacterium | EC  | 54148 | 92  | 68.5 |
| Paschalis     | MH155873 | Microbacterium | EC  | 52935 | 90  | 68.8 |
| Quhwah        | MH271321 | Microbacterium | EC  | 53549 | 94  | 68.8 |
| RobsFeet      | MH271312 | Microbacterium | EC  | 54189 | 97  | 68.6 |
| Hortus1       | MH271300 | Microbacterium | ED1 | 63119 | 114 | 64.6 |
| Jacko         | MH399779 | Microbacterium | ED1 | 61421 | 115 | 65.0 |
| OlinDD        | MH271307 | Microbacterium | ED1 | 63123 | 114 | 64.6 |
| Pioneer3      | MH271310 | Microbacterium | ED1 | 62954 | 114 | 64.6 |
| Tandem        | MH271316 | Microbacterium | ED1 | 63128 | 114 | 64.7 |
| Fork          | MH371108 | Microbacterium | ED2 | 62090 | 117 | 61.8 |
| Lyell         | MH371109 | Microbacterium | ED2 | 62716 | 122 | 61.6 |
| Musetta       | MH536823 | Microbacterium | ED2 | 63604 | 119 | 61.7 |
| BonaeVitae    | MH045556 | Microbacterium | EE  | 17451 | 27  | 68.2 |
| BurtonThePup  | MH045557 | Microbacterium | EE  | 17445 | 25  | 68.8 |
| Dongwon       | MH744416 | Microbacterium | EE  | 17362 | 25  | 68.5 |
| Efeko         | MH825700 | Microbacterium | EE  | 17491 | 28  | 68.6 |
| KayPaulus     | MH371118 | Microbacterium | EE  | 17455 | 25  | 68.5 |
| Miaurora      | MH779512 | Microbacterium | EE  | 17032 | 25  | 69.0 |
| Minima        | MH651181 | Microbacterium | EE  | 17362 | 25  | 68.5 |
| Noelani       | MH399783 | Microbacterium | EE  | 17349 | 25  | 68.2 |
| PaoPu         | MH045561 | Microbacterium | EE  | 17362 | 25  | 68.5 |
| Quaker        | MH371111 | Microbacterium | EE  | 17450 | 25  | 68.6 |
| Scamander     | MH576963 | Microbacterium | EE  | 17452 | 25  | 68.7 |
| VitulaEligans | MH371124 | Microbacterium | EE  | 17534 | 25  | 68.8 |
| AnnaSerena    | MH271292 | Microbacterium | EF  | 56707 | 83  | 63.8 |
| Krampus       | MH271301 | Microbacterium | EF  | 56708 | 83  | 63.8 |
| Hyperion      | MH153803 | Microbacterium | EG  | 61769 | 104 | 67.0 |
| OneinaGillian | MH727556 | Microbacterium | EG  | 61703 | 103 | 67.1 |
| Squash        | MH153813 | Microbacterium | EG  | 62312 | 108 | 66.8 |
| Floof         | MH271298 | Microbacterium | EH  | 48500 | 80  | 69.0 |
| Percival      | MH271308 | Microbacterium | EH  | 47364 | 74  | 69.6 |
| MementoMori   | MH271303 | Microbacterium | EI  | 55572 | 96  | 70.0 |

|               |           |                |           |       |     |      |
|---------------|-----------|----------------|-----------|-------|-----|------|
| Appa          | MH153799  | Microbacterium | Singleton | 38684 | 65  | 68.0 |
| Burro         | MH825698  | Microbacterium | Singleton | 54473 | 49  | 64.3 |
| Camille       | MH153800  | Microbacterium | Singleton | 53097 | 77  | 56.3 |
| Count         | MH153801  | Microbacterium | Singleton | 78922 | 131 | 51.4 |
| Hendrix       | MH183162  | Microbacterium | Singleton | 97757 | 154 | 66.1 |
| Min1          | NC_009603 | Microbacterium | Singleton | 46365 | 77  | 68.3 |
| Triscuit      | MH047631  | Microbacterium | Singleton | 67539 | 112 | 58.3 |
| ValentiniPuff | MH825712  | Microbacterium | Singleton | 62517 | 112 | 67.1 |
| Zeta1847      | MH271320  | Microbacterium | Singleton | 47921 | 75  | 71.4 |
| ISF9          | KJ173786  | Microbacterium | UNK       | 59256 | 120 | 62.8 |
| Abrogate      | KM597531  | Mycobacterium  | A1        | 52530 | 91  | 63.8 |
| Acme          | MG812486  | Mycobacterium  | A1        | 51793 | 91  | 63.5 |
| Adahisdi      | MH697575  | Mycobacterium  | A1        | 51703 | 84  | 63.8 |
| Aeneas        | JQ809703  | Mycobacterium  | A1        | 53684 | 99  | 63.6 |
| Alsfro        | KJ174156  | Mycobacterium  | A1        | 52136 | 98  | 63.6 |
| Alvin         | KP027205  | Mycobacterium  | A1        | 49577 | 86  | 63.6 |
| Arcanine      | MH744414  | Mycobacterium  | A1        | 52273 | 94  | 63.7 |
| Arlo          | MH576971  | Mycobacterium  | A1        | 52960 | 96  | 63.8 |
| Barriga       | KR997929  | Mycobacterium  | A1        | 52643 | 101 | 63.4 |
| BeesKnees     | MG872833  | Mycobacterium  | A1        | 51702 | 95  | 63.7 |
| Bethlehem     | AY500153  | Mycobacterium  | A1        | 52250 | 87  | 63.2 |
| Bigfoot       | KX702320  | Mycobacterium  | A1        | 51646 | 87  | 63.7 |
| BigMau        | MH450113  | Mycobacterium  | A1        | 52632 | 91  | 63.7 |
| BillKnuckles  | JN699000  | Mycobacterium  | A1        | 51821 | 86  | 63.4 |
| Bircsak       | KX522649  | Mycobacterium  | A1        | 53622 | 91  | 63.6 |
| Blue          | KY224001  | Mycobacterium  | A1        | 50864 | 84  | 63.9 |
| Bob3          | MG920060  | Mycobacterium  | A1        | 52233 | 94  | 63.8 |
| BPBiebs31     | JF957057  | Mycobacterium  | A1        | 53171 | 96  | 63.4 |
| Bruns         | JN698998  | Mycobacterium  | A1        | 53003 | 96  | 63.6 |
| Bxb1          | AF271693  | Mycobacterium  | A1        | 50550 | 86  | 63.6 |
| CactusRose    | KX683876  | Mycobacterium  | A1        | 52659 | 97  | 63.8 |
| ConceptII     | MH230876  | Mycobacterium  | A1        | 53287 | 97  | 63.5 |
| Corvo         | MG925340  | Mycobacterium  | A1        | 53325 | 94  | 63.7 |
| Crispicous1   | MH697581  | Mycobacterium  | A1        | 50827 | 89  | 63.7 |
| DD5           | EU744252  | Mycobacterium  | A1        | 51621 | 87  | 63.4 |
| Doom          | JN153085  | Mycobacterium  | A1        | 51421 | 85  | 63.8 |
| Dreamboat     | JN660814  | Mycobacterium  | A1        | 51083 | 94  | 63.9 |
| DrFeelGood    | MH536816  | Mycobacterium  | A1        | 50155 | 85  | 63.9 |
| Dynamix       | KT626047  | Mycobacterium  | A1        | 50628 | 91  | 63.7 |
| Edtherson     | KP027196  | Mycobacterium  | A1        | 51492 | 91  | 64.0 |
| Euphoria      | JN153086  | Mycobacterium  | A1        | 53597 | 94  | 63.7 |
| Fajezeel      | MG872836  | Mycobacterium  | A1        | 51083 | 90  | 63.4 |
| Fascinus      | MH000606  | Mycobacterium  | A1        | 52157 | 86  | 63.7 |
| Forsytheast   | MG925342  | Mycobacterium  | A1        | 52695 | 96  | 63.7 |
| GageAP        | MH020236  | Mycobacterium  | A1        | 51904 | 91  | 63.5 |
| Gompeii16     | KX522943  | Mycobacterium  | A1        | 53623 | 91  | 63.6 |
| Graduation    | KF560331  | Mycobacterium  | A1        | 52823 | 97  | 63.5 |
| Greg          | MG812489  | Mycobacterium  | A1        | 51083 | 90  | 63.4 |
| HanShotFirst  | KF493880  | Mycobacterium  | A1        | 52390 | 91  | 63.8 |

|                |          |               |    |       |    |      |
|----------------|----------|---------------|----|-------|----|------|
| Homines        | MH632117 | Mycobacterium | A1 | 48502 | 87 | 63.8 |
| Hope4ever      | MH513971 | Mycobacterium | A1 | 50455 | 88 | 63.6 |
| Ichabod        | MG925344 | Mycobacterium | A1 | 53317 | 95 | 63.8 |
| ILeeKay        | MF919508 | Mycobacterium | A1 | 51017 | 91 | 64.0 |
| Jasper         | EU744251 | Mycobacterium | A1 | 50968 | 94 | 63.7 |
| JC27           | JF937099 | Mycobacterium | A1 | 52169 | 97 | 63.6 |
| KBG            | EU744248 | Mycobacterium | A1 | 53572 | 89 | 63.6 |
| KSSJEB         | JF937110 | Mycobacterium | A1 | 51381 | 92 | 63.6 |
| Kugel          | JN699016 | Mycobacterium | A1 | 52379 | 95 | 63.8 |
| Kykar          | MG962370 | Mycobacterium | A1 | 50294 | 87 | 63.7 |
| Lamina13       | KJ409696 | Mycobacterium | A1 | 53255 | 96 | 63.7 |
| Lesedi         | JF937100 | Mycobacterium | A1 | 50486 | 89 | 63.8 |
| Lockley        | EU744249 | Mycobacterium | A1 | 51478 | 90 | 63.4 |
| Lopton         | MH020244 | Mycobacterium | A1 | 52394 | 87 | 63.5 |
| Magnar         | MH371110 | Mycobacterium | A1 | 51428 | 91 | 63.7 |
| Magnito        | KX550443 | Mycobacterium | A1 | 51743 | 92 | 63.8 |
| Makemake       | KX369584 | Mycobacterium | A1 | 52496 | 93 | 63.8 |
| Marcell        | JX307705 | Mycobacterium | A1 | 49186 | 83 | 64.0 |
| Maroc7         | MH651180 | Mycobacterium | A1 | 53350 | 92 | 63.5 |
| McGuire        | MG962372 | Mycobacterium | A1 | 51521 | 92 | 63.7 |
| Michley        | MH338238 | Mycobacterium | A1 | 51527 | 92 | 63.7 |
| Moose          | MH479919 | Mycobacterium | A1 | 52695 | 95 | 63.7 |
| MPlant7149     | MG925351 | Mycobacterium | A1 | 51372 | 92 | 63.7 |
| MrGordo        | JN020140 | Mycobacterium | A1 | 50988 | 92 | 63.8 |
| Mryolo         | MH338239 | Mycobacterium | A1 | 50505 | 87 | 64.0 |
| Museum         | JF937103 | Mycobacterium | A1 | 51426 | 90 | 63.6 |
| NEHalo         | MH590595 | Mycobacterium | A1 | 50535 | 88 | 63.8 |
| Nerujay        | KR080201 | Mycobacterium | A1 | 53455 | 97 | 63.7 |
| Nhonho         | KR997934 | Mycobacterium | A1 | 51355 | 88 | 63.8 |
| Niza           | MH399782 | Mycobacterium | A1 | 51672 | 89 | 63.4 |
| Oogway         | MH230878 | Mycobacterium | A1 | 51745 | 87 | 63.6 |
| PacerPaul      | KX574454 | Mycobacterium | A1 | 52732 | 93 | 63.6 |
| Papez          | KX369586 | Mycobacterium | A1 | 52501 | 94 | 63.8 |
| Pari           | KT438500 | Mycobacterium | A1 | 50614 | 91 | 63.5 |
| PattyP         | KC661273 | Mycobacterium | A1 | 52057 | 92 | 63.6 |
| Pepe           | KT818595 | Mycobacterium | A1 | 50515 | 86 | 64.0 |
| Perseus        | JN572689 | Mycobacterium | A1 | 53142 | 92 | 63.7 |
| Petruchio      | KY213952 | Mycobacterium | A1 | 49531 | 90 | 63.8 |
| PherrisBueller | MH669011 | Mycobacterium | A1 | 49209 | 88 | 64.0 |
| PhrostyMug     | KF279415 | Mycobacterium | A1 | 53636 | 97 | 63.7 |
| Pinto          | KJ690250 | Mycobacterium | A1 | 50610 | 87 | 63.5 |
| Pippin         | MG812495 | Mycobacterium | A1 | 52034 | 97 | 63.8 |
| Pita2          | MH576959 | Mycobacterium | A1 | 51486 | 91 | 63.4 |
| RidgeCB        | JN398369 | Mycobacterium | A1 | 50844 | 94 | 64.0 |
| Rohr           | MH450130 | Mycobacterium | A1 | 53483 | 92 | 63.6 |
| Rufus          | KT259047 | Mycobacterium | A1 | 52357 | 93 | 63.9 |
| Ruotula        | MG944220 | Mycobacterium | A1 | 52601 | 94 | 63.4 |
| SarFire        | KF024726 | Mycobacterium | A1 | 53701 | 99 | 63.8 |
| Scowl          | MG944221 | Mycobacterium | A1 | 51690 | 91 | 63.8 |

|                |          |               |     |       |     |      |
|----------------|----------|---------------|-----|-------|-----|------|
| Seabiscuit     | KJ194585 | Mycobacterium | A1  | 51781 | 94  | 63.7 |
| Sibs6          | MH576974 | Mycobacterium | A1  | 50210 | 95  | 63.8 |
| SkiPole        | GU247132 | Mycobacterium | A1  | 53137 | 102 | 63.6 |
| Smairt         | MF668283 | Mycobacterium | A1  | 54655 | 100 | 63.6 |
| Smeagol        | MH001458 | Mycobacterium | A1  | 53134 | 90  | 63.7 |
| Solon          | EU826470 | Mycobacterium | A1  | 49487 | 86  | 63.8 |
| SwissCheese    | MH450133 | Mycobacterium | A1  | 51822 | 95  | 63.5 |
| Switzer        | JF937108 | Mycobacterium | A1  | 52298 | 91  | 63.8 |
| Target         | MH576975 | Mycobacterium | A1  | 49097 | 90  | 63.6 |
| Tasp14         | KT326768 | Mycobacterium | A1  | 51409 | 89  | 63.9 |
| TheloniousMonk | KT363731 | Mycobacterium | A1  | 52055 | 90  | 63.6 |
| Thor           | KP027204 | Mycobacterium | A1  | 53058 | 98  | 63.7 |
| Treddle        | KP027203 | Mycobacterium | A1  | 53008 | 94  | 63.9 |
| Trouble        | KF024724 | Mycobacterium | A1  | 52102 | 94  | 63.6 |
| Turj99         | KT388014 | Mycobacterium | A1  | 51161 | 86  | 63.7 |
| U2             | AY500152 | Mycobacterium | A1  | 51277 | 81  | 63.7 |
| Violet         | JN687951 | Mycobacterium | A1  | 52481 | 90  | 63.8 |
| Wheeler        | KF416340 | Mycobacterium | A1  | 53588 | 96  | 63.3 |
| Wilkins        | MG099951 | Mycobacterium | A1  | 50907 | 94  | 63.9 |
| Zeeculate      | MH632118 | Mycobacterium | A1  | 53828 | 91  | 63.8 |
| Zephyr         | KX712238 | Mycobacterium | A1  | 52320 | 92  | 63.9 |
| Goose          | JX307704 | Mycobacterium | A10 | 50645 | 86  | 65.1 |
| KittenMittens  | MH001459 | Mycobacterium | A10 | 49894 | 78  | 64.5 |
| OKCentral2016  | MF773750 | Mycobacterium | A10 | 50072 | 83  | 65.1 |
| Rebeuca        | JX411619 | Mycobacterium | A10 | 51235 | 86  | 65.1 |
| RhynO          | KJ156985 | Mycobacterium | A10 | 46739 | 73  | 65.3 |
| Severus        | KC661279 | Mycobacterium | A10 | 49894 | 80  | 64.4 |
| Trike          | KM101120 | Mycobacterium | A10 | 44716 | 65  | 64.5 |
| Twister        | JQ512844 | Mycobacterium | A10 | 51094 | 87  | 65.0 |
| Ebony          | MH338236 | Mycobacterium | A11 | 52152 | 98  | 63.8 |
| Et2Brutus      | MF140410 | Mycobacterium | A11 | 52497 | 101 | 63.8 |
| Jabith         | KY471460 | Mycobacterium | A11 | 52715 | 99  | 63.7 |
| Joselito       | MH338237 | Mycobacterium | A11 | 52347 | 97  | 63.7 |
| Mulciber       | KU695581 | Mycobacterium | A11 | 52428 | 98  | 63.7 |
| Snape          | MH536828 | Mycobacterium | A11 | 52138 | 99  | 63.7 |
| DarthPhader    | KX657793 | Mycobacterium | A12 | 53432 | 91  | 63.2 |
| Steamy         | MH513984 | Mycobacterium | A12 | 53420 | 90  | 63.4 |
| Phlei          | KT206225 | Mycobacterium | A13 | 50418 | 81  | 60.1 |
| Luchador       | KR080193 | Mycobacterium | A14 | 53387 | 96  | 62.1 |
| EagleEye       | KF861510 | Mycobacterium | A16 | 52974 | 95  | 61.4 |
| 40AC           | KJ192196 | Mycobacterium | A17 | 53396 | 90  | 63.3 |
| MyraDee        | MF141539 | Mycobacterium | A18 | 50514 | 94  | 62.7 |
| Kimona         | MF472895 | Mycobacterium | A19 | 50283 | 87  | 64.4 |
| 20ES           | KJ410132 | Mycobacterium | A2  | 53124 | 96  | 63.4 |
| AbbyPaige      | MH077576 | Mycobacterium | A2  | 53225 | 96  | 63.4 |
| Acolyte        | MH509441 | Mycobacterium | A2  | 52668 | 92  | 63.3 |
| Adzzy          | KF416344 | Mycobacterium | A2  | 52519 | 96  | 62.6 |
| AnnaL29        | KF024721 | Mycobacterium | A2  | 53253 | 96  | 64.4 |
| Anselm         | MF919490 | Mycobacterium | A2  | 53545 | 98  | 63.5 |



|              |          |               |    |       |     |      |
|--------------|----------|---------------|----|-------|-----|------|
| ArcherNM     | KU761559 | Mycobacterium | A2 | 52561 | 91  | 64.2 |
| Bactobuster  | KU568494 | Mycobacterium | A2 | 52129 | 87  | 63.1 |
| Baehexic     | KX683875 | Mycobacterium | A2 | 53111 | 97  | 63.5 |
| BobSwaget    | MF185727 | Mycobacterium | A2 | 50400 | 88  | 63.3 |
| Changeling   | MF140403 | Mycobacterium | A2 | 52991 | 92  | 64.6 |
| Che12        | DQ398043 | Mycobacterium | A2 | 52047 | 98  | 62.9 |
| ChipMunk     | KU985095 | Mycobacterium | A2 | 53932 | 94  | 63.1 |
| CRB1         | KJ410134 | Mycobacterium | A2 | 52963 | 94  | 63.2 |
| Crucio       | MH338234 | Mycobacterium | A2 | 53256 | 95  | 63.5 |
| D29          | AF022214 | Mycobacterium | A2 | 49136 | 77  | 63.5 |
| Dalmatian    | MF919500 | Mycobacterium | A2 | 52850 | 95  | 63.5 |
| Drake55      | MF668269 | Mycobacterium | A2 | 52719 | 96  | 63.4 |
| DudeLittle   | KX576639 | Mycobacterium | A2 | 52917 | 94  | 63.5 |
| Echild       | KF981601 | Mycobacterium | A2 | 53159 | 100 | 63.7 |
| Equemioh13   | KJ959632 | Mycobacterium | A2 | 53042 | 96  | 63.5 |
| EvilGenius   | KU985093 | Mycobacterium | A2 | 53935 | 93  | 63.0 |
| Fameo        | MH051252 | Mycobacterium | A2 | 52618 | 94  | 63.4 |
| First        | JX899358 | Mycobacterium | A2 | 53028 | 95  | 63.4 |
| Flare16      | MH825701 | Mycobacterium | A2 | 52858 | 97  | 63.5 |
| Heffalump    | KY965065 | Mycobacterium | A2 | 53085 | 92  | 63.6 |
| Jaan         | KX758539 | Mycobacterium | A2 | 52462 | 90  | 63.2 |
| Jerm         | KX619650 | Mycobacterium | A2 | 53163 | 95  | 63.3 |
| JoshKayV     | MF472896 | Mycobacterium | A2 | 53366 | 97  | 63.0 |
| Journey13    | KY798216 | Mycobacterium | A2 | 48502 | 81  | 62.7 |
| Jsquared     | MH020237 | Mycobacterium | A2 | 52967 | 101 | 62.6 |
| Kalpine      | KX641263 | Mycobacterium | A2 | 53330 | 96  | 64.4 |
| Kerberos     | KX758538 | Mycobacterium | A2 | 52753 | 93  | 63.5 |
| L5           | Z18946   | Mycobacterium | A2 | 52297 | 90  | 62.3 |
| LadyBird     | KT588442 | Mycobacterium | A2 | 53141 | 96  | 63.5 |
| Larenn       | KM677210 | Mycobacterium | A2 | 52967 | 92  | 63.5 |
| LilTurb      | MH825704 | Mycobacterium | A2 | 53153 | 95  | 63.3 |
| Lokk         | MF324899 | Mycobacterium | A2 | 51008 | 89  | 63.4 |
| Loser        | KU761558 | Mycobacterium | A2 | 53486 | 97  | 64.5 |
| MissWhite    | MF472893 | Mycobacterium | A2 | 50263 | 92  | 63.3 |
| NaSiaTalie   | KU297783 | Mycobacterium | A2 | 52920 | 98  | 63.4 |
| NicoleTera   | MH825709 | Mycobacterium | A2 | 52944 | 93  | 64.0 |
| Odin         | KF017927 | Mycobacterium | A2 | 52807 | 94  | 62.3 |
| Ph8s         | MG099947 | Mycobacterium | A2 | 52874 | 97  | 62.6 |
| Piro94       | KM197169 | Mycobacterium | A2 | 52647 | 94  | 63.4 |
| Pomar16      | KX574455 | Mycobacterium | A2 | 52833 | 93  | 63.4 |
| Power        | KM463009 | Mycobacterium | A2 | 53395 | 95  | 63.5 |
| Pukovnik     | EU744250 | Mycobacterium | A2 | 52892 | 88  | 63.3 |
| QueenBeesly  | MH697591 | Mycobacterium | A2 | 53348 | 95  | 63.5 |
| RedRock      | GU339467 | Mycobacterium | A2 | 53332 | 95  | 64.5 |
| Serenity     | KT381276 | Mycobacterium | A2 | 52088 | 97  | 62.6 |
| SnapTap      | MF919531 | Mycobacterium | A2 | 53051 | 95  | 63.5 |
| StarStuff    | KX897981 | Mycobacterium | A2 | 52785 | 93  | 63.5 |
| SweetiePie   | KM591906 | Mycobacterium | A2 | 53184 | 95  | 63.5 |
| TipsytheTRex | MF919536 | Mycobacterium | A2 | 52350 | 93  | 62.5 |

|                |          |               |    |       |    |      |
|----------------|----------|---------------|----|-------|----|------|
| Tomathan       | MH513985 | Mycobacterium | A2 | 52876 | 93 | 63.4 |
| Trixie         | JN408461 | Mycobacterium | A2 | 53526 | 92 | 64.5 |
| Turbido        | JN408460 | Mycobacterium | A2 | 53169 | 94 | 63.3 |
| Updawg         | MF919538 | Mycobacterium | A2 | 53043 | 97 | 63.5 |
| Aglet          | KX507362 | Mycobacterium | A3 | 50866 | 91 | 64.1 |
| Anubis         | KF279418 | Mycobacterium | A3 | 50854 | 93 | 64.0 |
| AugsMagnumOpus | MH536813 | Mycobacterium | A3 | 48545 | 87 | 64.2 |
| BabyRay        | KX683423 | Mycobacterium | A3 | 50657 | 92 | 63.6 |
| Beauxregard13  | MH155864 | Mycobacterium | A3 | 50884 | 89 | 64.0 |
| BreSam8        | MH576949 | Mycobacterium | A3 | 50843 | 90 | 64.0 |
| BuzzBuzz       | KX523125 | Mycobacterium | A3 | 50897 | 83 | 64.2 |
| Bxz2           | AY129332 | Mycobacterium | A3 | 50913 | 86 | 64.2 |
| DaHudson       | KT359365 | Mycobacterium | A3 | 50841 | 89 | 64.1 |
| EpicPhail      | MG925341 | Mycobacterium | A3 | 50884 | 91 | 64.0 |
| Farber         | KM233455 | Mycobacterium | A3 | 49190 | 84 | 64.2 |
| Fred313        | MF373840 | Mycobacterium | A3 | 50053 | 85 | 64.0 |
| Grum1          | MH399776 | Mycobacterium | A3 | 50883 | 90 | 64.1 |
| HelDan         | JF957058 | Mycobacterium | A3 | 50364 | 89 | 64.0 |
| Hercules11     | KU985091 | Mycobacterium | A3 | 50892 | 90 | 64.0 |
| Hookmount      | MH316563 | Mycobacterium | A3 | 50061 | 88 | 64.1 |
| Idleandcovert  | KY464936 | Mycobacterium | A3 | 49156 | 84 | 63.8 |
| Isca           | MN586063 | Mycobacterium | A3 | 49968 | 86 | 64.2 |
| JenCasNa       | KU255188 | Mycobacterium | A3 | 50877 | 91 | 64.0 |
| JHC117         | JF704098 | Mycobacterium | A3 | 50877 | 85 | 64.0 |
| Jobu08         | KC661281 | Mycobacterium | A3 | 50679 | 85 | 64.0 |
| KADY           | MF185729 | Mycobacterium | A3 | 50898 | 87 | 64.2 |
| Kalnoky        | MH450119 | Mycobacterium | A3 | 50571 | 89 | 64.0 |
| Lambert1       | MG812492 | Mycobacterium | A3 | 50042 | 88 | 64.1 |
| Lilith         | MH020238 | Mycobacterium | A3 | 50841 | 87 | 64.1 |
| Louie6         | KX670788 | Mycobacterium | A3 | 50899 | 89 | 64.2 |
| LugYA          | MG757161 | Mycobacterium | A3 | 50878 | 93 | 64.0 |
| MadMarie       | MH651179 | Mycobacterium | A3 | 50849 | 87 | 64.0 |
| Malinsilva     | KU984914 | Mycobacterium | A3 | 50839 | 93 | 64.0 |
| Margo          | KX640831 | Mycobacterium | A3 | 50087 | 88 | 64.0 |
| Marie          | KU578077 | Mycobacterium | A3 | 50877 | 88 | 64.0 |
| Marius         | MH450124 | Mycobacterium | A3 | 50570 | 89 | 64.0 |
| MarQuardt      | KM233454 | Mycobacterium | A3 | 50882 | 90 | 64.0 |
| Methuseloh     | KC661272 | Mycobacterium | A3 | 50891 | 83 | 64.2 |
| Microwolf      | JF704101 | Mycobacterium | A3 | 50864 | 85 | 64.0 |
| Misomonster    | MH513975 | Mycobacterium | A3 | 48504 | 86 | 64.3 |
| MuchMore       | MH727554 | Mycobacterium | A3 | 48545 | 87 | 64.2 |
| OlanP          | MG925355 | Mycobacterium | A3 | 50755 | 87 | 64.0 |
| Ollie          | MH536825 | Mycobacterium | A3 | 50721 | 90 | 64.0 |
| Panamaxus      | MH020248 | Mycobacterium | A3 | 50080 | 83 | 64.1 |
| Penny1         | KX458237 | Mycobacterium | A3 | 50884 | 90 | 64.0 |
| PGHhamlin      | MH077583 | Mycobacterium | A3 | 50840 | 92 | 64.0 |
| Phantastic     | KJ510415 | Mycobacterium | A3 | 50101 | 91 | 63.8 |
| PhishRPhriends | MH450126 | Mycobacterium | A3 | 49756 | 85 | 63.9 |
| Phoxy          | KP017310 | Mycobacterium | A3 | 49267 | 85 | 64.2 |

|               |          |               |    |       |    |      |
|---------------|----------|---------------|----|-------|----|------|
| Phranny       | MH371121 | Mycobacterium | A3 | 48024 | 81 | 64.0 |
| Pistachio     | MH047633 | Mycobacterium | A3 | 50006 | 88 | 63.8 |
| Puppy         | MH047632 | Mycobacterium | A3 | 50084 | 89 | 63.8 |
| PurpleHaze    | KY965063 | Mycobacterium | A3 | 48596 | 83 | 64.0 |
| QuinnKiro     | KM592966 | Mycobacterium | A3 | 50066 | 87 | 64.0 |
| Reba          | MH450128 | Mycobacterium | A3 | 49412 | 84 | 64.0 |
| Rockstar      | JF704111 | Mycobacterium | A3 | 47780 | 78 | 64.3 |
| Sabia         | MH338240 | Mycobacterium | A3 | 50855 | 87 | 64.0 |
| Sabinator     | KX808129 | Mycobacterium | A3 | 50883 | 88 | 64.0 |
| Spike509      | KP017311 | Mycobacterium | A3 | 50989 | 91 | 64.1 |
| Stagni        | MF185732 | Mycobacterium | A3 | 50856 | 86 | 64.0 |
| StepMih       | MF185733 | Mycobacterium | A3 | 50841 | 90 | 64.0 |
| Taurus        | KP027202 | Mycobacterium | A3 | 50877 | 91 | 64.0 |
| Texage        | KT326767 | Mycobacterium | A3 | 50081 | 86 | 64.0 |
| Tiffany       | KM101119 | Mycobacterium | A3 | 50768 | 89 | 64.0 |
| TNguyen7      | MH051259 | Mycobacterium | A3 | 50413 | 91 | 63.8 |
| Todacoro      | KX670828 | Mycobacterium | A3 | 50066 | 88 | 64.0 |
| Vix           | JF704114 | Mycobacterium | A3 | 50963 | 85 | 64.0 |
| Watson        | KX664448 | Mycobacterium | A3 | 50841 | 89 | 64.0 |
| Wooldri       | KT381277 | Mycobacterium | A3 | 50797 | 92 | 64.0 |
| Abdiel        | KY083058 | Mycobacterium | A4 | 51381 | 88 | 63.9 |
| Achebe        | KY083059 | Mycobacterium | A4 | 51433 | 86 | 63.7 |
| Albee         | KX817175 | Mycobacterium | A4 | 51372 | 88 | 63.9 |
| Annyong       | MH051247 | Mycobacterium | A4 | 51418 | 87 | 63.9 |
| Arturo        | JX307702 | Mycobacterium | A4 | 51500 | 86 | 64.1 |
| Avle17        | MH509443 | Mycobacterium | A4 | 51366 | 88 | 63.9 |
| Backyardigan  | JF704093 | Mycobacterium | A4 | 51308 | 84 | 63.7 |
| Badger        | KX550442 | Mycobacterium | A4 | 51274 | 85 | 63.7 |
| BellusTerra   | KF841475 | Mycobacterium | A4 | 51236 | 89 | 63.9 |
| Blackmoor     | MG099942 | Mycobacterium | A4 | 51374 | 87 | 63.9 |
| Broseidon     | KX808130 | Mycobacterium | A4 | 51374 | 88 | 63.9 |
| Bruiser       | KY083060 | Mycobacterium | A4 | 51374 | 88 | 63.9 |
| BubbleTrouble | KY204244 | Mycobacterium | A4 | 51397 | 88 | 63.9 |
| Burger        | KU985094 | Mycobacterium | A4 | 51371 | 86 | 63.9 |
| Caelakin      | KT716493 | Mycobacterium | A4 | 51374 | 87 | 63.9 |
| Camperdownii  | KY204245 | Mycobacterium | A4 | 51131 | 87 | 63.9 |
| Cerulean      | MF919496 | Mycobacterium | A4 | 51809 | 92 | 63.9 |
| ChampagnePapi | MH651170 | Mycobacterium | A4 | 51811 | 92 | 63.9 |
| Cindaradix    | MF919498 | Mycobacterium | A4 | 51575 | 84 | 64.0 |
| Clarenza      | KY204246 | Mycobacterium | A4 | 51372 | 88 | 63.9 |
| Cocoaberry    | KX648373 | Mycobacterium | A4 | 51376 | 89 | 64.0 |
| Commander     | MH479909 | Mycobacterium | A4 | 51369 | 86 | 63.9 |
| Dhanush       | KC661271 | Mycobacterium | A4 | 51373 | 88 | 63.9 |
| Druantia      | MH536817 | Mycobacterium | A4 | 51343 | 87 | 63.8 |
| Eagle         | HM152766 | Mycobacterium | A4 | 51436 | 87 | 63.9 |
| Eapen         | MH479911 | Mycobacterium | A4 | 51366 | 89 | 63.9 |
| Eris          | KY083063 | Mycobacterium | A4 | 51386 | 88 | 64.0 |
| Floean        | KX557234 | Mycobacterium | A4 | 51371 | 88 | 63.9 |
| Flux          | JQ809701 | Mycobacterium | A4 | 51370 | 89 | 63.9 |

|                |          |               |    |       |    |      |
|----------------|----------|---------------|----|-------|----|------|
| Funston        | KY204247 | Mycobacterium | A4 | 51372 | 88 | 64.0 |
| Gadost         | KP027198 | Mycobacterium | A4 | 51376 | 88 | 64.0 |
| HamSlice       | KP057620 | Mycobacterium | A4 | 51370 | 84 | 63.9 |
| Holli          | KU985092 | Mycobacterium | A4 | 51162 | 88 | 63.9 |
| Houdini22      | MH399777 | Mycobacterium | A4 | 51376 | 89 | 64.0 |
| ICleared       | JQ896627 | Mycobacterium | A4 | 51440 | 88 | 63.9 |
| Iracema64      | KU055616 | Mycobacterium | A4 | 51637 | 88 | 64.0 |
| Jaykayelowell  | MH697588 | Mycobacterium | A4 | 51367 | 86 | 63.9 |
| JetBlade       | MF919509 | Mycobacterium | A4 | 51374 | 90 | 63.9 |
| JoongJeon      | KY204248 | Mycobacterium | A4 | 51366 | 88 | 63.9 |
| Kampy          | KJ510414 | Mycobacterium | A4 | 51378 | 88 | 63.9 |
| KFPoly         | KY204249 | Mycobacterium | A4 | 51365 | 88 | 63.9 |
| Kratark        | KY204250 | Mycobacterium | A4 | 51407 | 88 | 63.9 |
| LeoAvram       | KY006473 | Mycobacterium | A4 | 47079 | 75 | 63.8 |
| LHTSCC         | JN699015 | Mycobacterium | A4 | 51813 | 91 | 63.9 |
| LittleB        | KX817174 | Mycobacterium | A4 | 51373 | 88 | 63.9 |
| LittleGuy      | KX550441 | Mycobacterium | A4 | 51178 | 88 | 63.9 |
| Maverick       | KT365397 | Mycobacterium | A4 | 51372 | 91 | 63.9 |
| Medusa         | KF024733 | Mycobacterium | A4 | 51384 | 87 | 63.9 |
| MeeZee         | JN243856 | Mycobacterium | A4 | 51368 | 87 | 63.9 |
| Melvin         | KF841476 | Mycobacterium | A4 | 51369 | 91 | 63.9 |
| Millski        | KY083062 | Mycobacterium | A4 | 51374 | 88 | 63.9 |
| Morpher26      | MF668278 | Mycobacterium | A4 | 51294 | 86 | 63.7 |
| Morrow         | MG962373 | Mycobacterium | A4 | 51411 | 91 | 63.8 |
| Mundrea        | KX579975 | Mycobacterium | A4 | 51257 | 87 | 64.0 |
| Nemo27         | MH077581 | Mycobacterium | A4 | 51372 | 88 | 63.9 |
| NorthStar      | MH230877 | Mycobacterium | A4 | 51374 | 86 | 63.9 |
| NotAPhaseMom   | MH399785 | Mycobacterium | A4 | 51376 | 89 | 64.0 |
| Nyxis          | KF954506 | Mycobacterium | A4 | 51250 | 87 | 63.9 |
| Obama12        | KF959563 | Mycobacterium | A4 | 51797 | 89 | 64.0 |
| Palestino      | KY083061 | Mycobacterium | A4 | 51369 | 88 | 63.9 |
| Peaches        | GQ303263 | Mycobacterium | A4 | 51376 | 86 | 63.9 |
| Phacado        | MG944217 | Mycobacterium | A4 | 51373 | 88 | 63.9 |
| Pipcraft       | MH155875 | Mycobacterium | A4 | 51376 | 85 | 63.9 |
| Relief         | MH155879 | Mycobacterium | A4 | 51368 | 87 | 63.9 |
| Romney         | KU867906 | Mycobacterium | A4 | 51370 | 87 | 63.9 |
| Roosevelt      | KX619651 | Mycobacterium | A4 | 51502 | 87 | 63.9 |
| Ruin           | MH825710 | Mycobacterium | A4 | 51365 | 88 | 63.9 |
| Sabertooth     | JX307703 | Mycobacterium | A4 | 51377 | 88 | 63.9 |
| Shaka          | JF792674 | Mycobacterium | A4 | 51369 | 86 | 63.9 |
| Skipitt        | MH020249 | Mycobacterium | A4 | 51365 | 87 | 63.9 |
| Stasia         | KX641260 | Mycobacterium | A4 | 51591 | 85 | 63.6 |
| Thanksgivukkah | KY204251 | Mycobacterium | A4 | 51370 | 88 | 63.9 |
| TinaFeyge      | KY471266 | Mycobacterium | A4 | 51367 | 86 | 63.9 |
| Tinybot        | KY549155 | Mycobacterium | A4 | 51402 | 89 | 64.0 |
| TiroTheta9     | JN561150 | Mycobacterium | A4 | 51367 | 87 | 63.9 |
| Wander         | MG944224 | Mycobacterium | A4 | 51366 | 88 | 63.9 |
| Wilbur         | KX458236 | Mycobacterium | A4 | 51370 | 88 | 63.9 |
| Wile           | JN243857 | Mycobacterium | A4 | 51308 | 85 | 63.7 |

|              |          |               |    |       |     |      |
|--------------|----------|---------------|----|-------|-----|------|
| Wizard007    | MH727563 | Mycobacterium | A4 | 51029 | 86  | 63.9 |
| AgentM       | MG099934 | Mycobacterium | A5 | 50503 | 85  | 60.9 |
| Airmid       | JN083853 | Mycobacterium | A5 | 51241 | 89  | 60.0 |
| Aragog       | MG099937 | Mycobacterium | A5 | 50812 | 86  | 60.8 |
| Archetta     | MG099938 | Mycobacterium | A5 | 47409 | 75  | 60.6 |
| Benedict     | JN083852 | Mycobacterium | A5 | 51083 | 90  | 59.8 |
| Chadwick     | KT246486 | Mycobacterium | A5 | 49421 | 88  | 59.8 |
| Conspiracy   | KF560330 | Mycobacterium | A5 | 50755 | 86  | 60.6 |
| Coog         | MH051250 | Mycobacterium | A5 | 51215 | 84  | 61.0 |
| Cuco         | JN408459 | Mycobacterium | A5 | 50965 | 86  | 60.9 |
| Dublin       | MH338235 | Mycobacterium | A5 | 50280 | 87  | 60.9 |
| EITiger69    | JX042578 | Mycobacterium | A5 | 51505 | 92  | 59.8 |
| ForGetIt     | MG099944 | Mycobacterium | A5 | 51050 | 87  | 60.6 |
| George       | JF704107 | Mycobacterium | A5 | 51578 | 82  | 61.0 |
| Jabiru       | MH051254 | Mycobacterium | A5 | 50530 | 86  | 60.0 |
| Jovo         | KF493882 | Mycobacterium | A5 | 51319 | 84  | 60.8 |
| LittleCherry | KF017001 | Mycobacterium | A5 | 50690 | 87  | 60.9 |
| Midas2       | MH051256 | Mycobacterium | A5 | 51215 | 84  | 61.0 |
| Naca         | MH020239 | Mycobacterium | A5 | 51594 | 87  | 59.8 |
| Phlorence    | MG099949 | Mycobacterium | A5 | 50403 | 84  | 60.9 |
| Swirley      | KM101118 | Mycobacterium | A5 | 49717 | 87  | 61.0 |
| Tarynearal   | MH338241 | Mycobacterium | A5 | 51143 | 89  | 60.9 |
| Theia        | KT438501 | Mycobacterium | A5 | 51543 | 87  | 60.8 |
| Tiger        | JQ684677 | Mycobacterium | A5 | 50332 | 85  | 60.7 |
| UnionJack    | KT004677 | Mycobacterium | A5 | 49158 | 86  | 60.0 |
| Artemis2UCLA | KF560333 | Mycobacterium | A6 | 52344 | 102 | 61.4 |
| Blue7        | JN698999 | Mycobacterium | A6 | 52288 | 103 | 61.4 |
| CloudWang3   | KF560332 | Mycobacterium | A6 | 52873 | 103 | 61.4 |
| DaVinci      | JF937092 | Mycobacterium | A6 | 51547 | 97  | 61.5 |
| EricB        | JN049605 | Mycobacterium | A6 | 51702 | 97  | 61.5 |
| Gladiator    | JF704097 | Mycobacterium | A6 | 52213 | 96  | 61.4 |
| GreedyLawyer | MH051253 | Mycobacterium | A6 | 52091 | 88  | 61.5 |
| Gruunaga     | KX576638 | Mycobacterium | A6 | 52195 | 101 | 61.4 |
| Hammer       | JF937094 | Mycobacterium | A6 | 51889 | 104 | 61.3 |
| Isiphiwo     | KX641261 | Mycobacterium | A6 | 51910 | 96  | 61.6 |
| Jeffabunny   | JN699019 | Mycobacterium | A6 | 48963 | 92  | 61.6 |
| Kazan        | KU985096 | Mycobacterium | A6 | 52160 | 101 | 61.6 |
| Koko         | MG099945 | Mycobacterium | A6 | 52879 | 102 | 61.3 |
| McFly        | KU695582 | Mycobacterium | A6 | 52502 | 99  | 61.5 |
| Priamo       | MH155876 | Mycobacterium | A6 | 51633 | 98  | 61.4 |
| SuperAwesome | MH020240 | Mycobacterium | A6 | 52686 | 99  | 61.6 |
| ToneTone     | KX375815 | Mycobacterium | A6 | 52044 | 96  | 61.5 |
| VohminGhazi  | KM401838 | Mycobacterium | A6 | 52155 | 100 | 61.5 |
| Wiks         | MF668288 | Mycobacterium | A6 | 52122 | 100 | 61.5 |
| WunderPhul   | MG099952 | Mycobacterium | A6 | 48724 | 89  | 61.5 |
| Zaka         | KF560334 | Mycobacterium | A6 | 52122 | 101 | 61.5 |
| Zulu         | MH779517 | Mycobacterium | A6 | 52499 | 101 | 61.4 |
| HINderR      | KC661275 | Mycobacterium | A7 | 52617 | 84  | 62.8 |
| Sheen        | KP273225 | Mycobacterium | A7 | 52927 | 84  | 63.4 |

|                |          |               |    |       |     |      |
|----------------|----------|---------------|----|-------|-----|------|
| Timshel        | JF957060 | Mycobacterium | A7 | 53278 | 85  | 63.1 |
| Astro          | JX015524 | Mycobacterium | A8 | 52494 | 99  | 61.4 |
| Dixon          | MH651173 | Mycobacterium | A8 | 52055 | 99  | 61.4 |
| NearlyHeadless | MH825708 | Mycobacterium | A8 | 52383 | 101 | 61.4 |
| Saintus        | JN831654 | Mycobacterium | A8 | 49228 | 95  | 61.2 |
| Smeadley       | KT184694 | Mycobacterium | A8 | 52392 | 100 | 61.4 |
| Alma           | JN699005 | Mycobacterium | A9 | 53177 | 96  | 62.5 |
| Catalina       | KU613353 | Mycobacterium | A9 | 53411 | 101 | 62.6 |
| Conquerage     | MG872835 | Mycobacterium | A9 | 52953 | 96  | 62.5 |
| Eidsmoe        | KU716094 | Mycobacterium | A9 | 52946 | 96  | 62.5 |
| HortumSL17     | KX585252 | Mycobacterium | A9 | 53426 | 100 | 62.6 |
| Myxus          | KU716095 | Mycobacterium | A9 | 53425 | 99  | 62.6 |
| PackMan        | JF704110 | Mycobacterium | A9 | 51339 | 93  | 62.6 |
| Phaeder        | KX664447 | Mycobacterium | A9 | 53300 | 99  | 62.6 |
| Phonnegut      | MG872840 | Mycobacterium | A9 | 53219 | 99  | 62.6 |
| Pioneer        | KT285706 | Mycobacterium | A9 | 53219 | 99  | 62.6 |
| Priya          | MH371122 | Mycobacterium | A9 | 52949 | 96  | 62.5 |
| Qobbit         | KX685355 | Mycobacterium | A9 | 52911 | 96  | 62.6 |
| Scherzo        | MG872842 | Mycobacterium | A9 | 53355 | 97  | 62.7 |
| FF47           | JX901189 | Mycobacterium | AB | 47724 | 73  | 58.6 |
| Muddy          | KF024728 | Mycobacterium | AB | 48228 | 71  | 58.8 |
| Cuke           | MG757156 | Mycobacterium | AC | 68869 | 127 | 49.1 |
| Fowlmouth      | MH834613 | Mycobacterium | AC | 69660 | 120 | 48.7 |
| ABU            | JF704091 | Mycobacterium | B1 | 68850 | 100 | 66.5 |
| AltPhacts      | MG962362 | Mycobacterium | B1 | 68056 | 99  | 66.5 |
| Apizium        | KR781349 | Mycobacterium | B1 | 68227 | 100 | 66.4 |
| Ashraf         | KY385380 | Mycobacterium | B1 | 69082 | 103 | 66.3 |
| Badfish        | KJ194580 | Mycobacterium | B1 | 69030 | 102 | 66.5 |
| Banjo          | MH230874 | Mycobacterium | B1 | 68296 | 98  | 66.5 |
| BatteryCK      | MG962363 | Mycobacterium | B1 | 68509 | 100 | 66.4 |
| BlackStallion  | KY965066 | Mycobacterium | B1 | 68714 | 101 | 66.5 |
| Buckeye        | MH450116 | Mycobacterium | B1 | 69174 | 100 | 66.5 |
| Chah           | FJ174694 | Mycobacterium | B1 | 68450 | 104 | 66.5 |
| CharlieGBrown  | KX576647 | Mycobacterium | B1 | 68604 | 100 | 66.4 |
| CheetO         | MH230875 | Mycobacterium | B1 | 68503 | 98  | 66.5 |
| Childish       | MH371114 | Mycobacterium | B1 | 69044 | 102 | 66.5 |
| Chorkpop       | KY676783 | Mycobacterium | B1 | 68506 | 103 | 66.4 |
| Chunky         | MG925339 | Mycobacterium | B1 | 68249 | 100 | 66.5 |
| Cobra          | MH051264 | Mycobacterium | B1 | 68875 | 102 | 66.4 |
| Colbert        | GQ303259 | Mycobacterium | B1 | 67774 | 100 | 66.5 |
| Craff          | MH399773 | Mycobacterium | B1 | 69263 | 103 | 66.4 |
| Crownjwl       | MH779500 | Mycobacterium | B1 | 68521 | 99  | 66.6 |
| Daffy          | KX683293 | Mycobacterium | B1 | 68492 | 101 | 66.5 |
| Derpp          | KX576645 | Mycobacterium | B1 | 68637 | 101 | 66.4 |
| Dingo          | MF919503 | Mycobacterium | B1 | 67776 | 98  | 66.6 |
| Doddsville     | MH371107 | Mycobacterium | B1 | 68243 | 98  | 66.4 |
| DoesntMatter   | MG962365 | Mycobacterium | B1 | 68331 | 99  | 66.5 |
| DonSanchon     | MH576970 | Mycobacterium | B1 | 68015 | 97  | 66.5 |
| DuchessDung    | MH051251 | Mycobacterium | B1 | 68235 | 99  | 66.4 |

|               |          |               |    |       |     |      |
|---------------|----------|---------------|----|-------|-----|------|
| EmpTee        | KJ567044 | Mycobacterium | B1 | 68428 | 101 | 66.5 |
| Eremos        | KM236502 | Mycobacterium | B1 | 68472 | 99  | 66.5 |
| Fang          | GU247133 | Mycobacterium | B1 | 68569 | 102 | 66.5 |
| FluffyNinja   | KP027197 | Mycobacterium | B1 | 68716 | 103 | 66.5 |
| FriarPreacher | KX576643 | Mycobacterium | B1 | 68415 | 99  | 66.4 |
| FugateOSU     | MH479914 | Mycobacterium | B1 | 69476 | 102 | 66.5 |
| Gareth        | MH399775 | Mycobacterium | B1 | 68866 | 102 | 66.5 |
| GeneCoco      | MH479916 | Mycobacterium | B1 | 68547 | 100 | 66.4 |
| Gophee        | MH651175 | Mycobacterium | B1 | 68856 | 101 | 66.5 |
| Grand2040     | MH744417 | Mycobacterium | B1 | 68591 | 99  | 66.4 |
| Gyarad        | JX649099 | Mycobacterium | B1 | 68004 | 99  | 66.5 |
| Haimas        | MG770212 | Mycobacterium | B1 | 68296 | 99  | 66.5 |
| Hamish        | MH825702 | Mycobacterium | B1 | 68584 | 99  | 66.5 |
| Harvey        | JF937095 | Mycobacterium | B1 | 68193 | 99  | 66.5 |
| Held          | KX683292 | Mycobacterium | B1 | 68314 | 100 | 66.5 |
| Hertubise     | JF937097 | Mycobacterium | B1 | 68675 | 101 | 66.4 |
| Hetaeria      | KT364588 | Mycobacterium | B1 | 68405 | 101 | 66.5 |
| HighStump     | MG757158 | Mycobacterium | B1 | 68821 | 104 | 66.5 |
| Horchata      | MF919507 | Mycobacterium | B1 | 68171 | 96  | 66.4 |
| HSavage       | MH576954 | Mycobacterium | B1 | 67993 | 99  | 66.5 |
| ImtiyazSitla  | KY385382 | Mycobacterium | B1 | 69082 | 103 | 66.3 |
| Iridoclysis   | KX592589 | Mycobacterium | B1 | 68597 | 101 | 66.4 |
| IsaacEli      | JN698990 | Mycobacterium | B1 | 68839 | 104 | 66.5 |
| JacAttac      | JN698989 | Mycobacterium | B1 | 68311 | 102 | 66.5 |
| JangoPhett    | MG757159 | Mycobacterium | B1 | 68673 | 100 | 66.5 |
| Kahve         | MH371117 | Mycobacterium | B1 | 69031 | 102 | 66.5 |
| Kailash       | MF919511 | Mycobacterium | B1 | 68953 | 100 | 66.3 |
| Kikipoo       | JN699017 | Mycobacterium | B1 | 68839 | 104 | 66.5 |
| KingTut       | MH450122 | Mycobacterium | B1 | 64827 | 92  | 66.5 |
| KingVeVeVe    | KJ538723 | Mycobacterium | B1 | 68043 | 100 | 66.5 |
| KlimbOn       | MH651177 | Mycobacterium | B1 | 68596 | 101 | 66.5 |
| KLucky39      | JF704099 | Mycobacterium | B1 | 68138 | 100 | 66.5 |
| Kwksand96     | MH513973 | Mycobacterium | B1 | 68822 | 103 | 66.4 |
| Labeouficaum  | MH479918 | Mycobacterium | B1 | 68637 | 102 | 66.4 |
| Lasso         | KM408320 | Mycobacterium | B1 | 68576 | 101 | 66.4 |
| LeeLot        | MG925346 | Mycobacterium | B1 | 68921 | 100 | 66.5 |
| Lego3393      | KX620786 | Mycobacterium | B1 | 69037 | 102 | 66.5 |
| LemonSlice    | MF155947 | Mycobacterium | B1 | 68324 | 102 | 66.5 |
| Longacauda    | MF919519 | Mycobacterium | B1 | 68804 | 102 | 66.4 |
| Lulumae       | MF668276 | Mycobacterium | B1 | 68056 | 97  | 66.6 |
| Mana          | KX578071 | Mycobacterium | B1 | 68479 | 99  | 66.4 |
| Manad         | KJ595576 | Mycobacterium | B1 | 68807 | 101 | 66.4 |
| Maskar        | KY385383 | Mycobacterium | B1 | 69082 | 103 | 66.3 |
| Megatron      | MG925348 | Mycobacterium | B1 | 69009 | 103 | 66.5 |
| Mesh1         | MH825705 | Mycobacterium | B1 | 68774 | 102 | 66.4 |
| MichaelPhcott | MH576958 | Mycobacterium | B1 | 68494 | 100 | 66.4 |
| Mikota        | MF919523 | Mycobacterium | B1 | 67768 | 96  | 66.6 |
| MitKao        | KX670813 | Mycobacterium | B1 | 68493 | 102 | 66.5 |
| Morgushi      | JN638753 | Mycobacterium | B1 | 68307 | 99  | 66.4 |

|                |          |               |    |       |     |      |
|----------------|----------|---------------|----|-------|-----|------|
| Morty          | MH371125 | Mycobacterium | B1 | 68878 | 102 | 66.5 |
| Mosaic         | MG925350 | Mycobacterium | B1 | 68488 | 99  | 66.5 |
| Mulan          | MH727555 | Mycobacterium | B1 | 68521 | 101 | 66.5 |
| Murdoc         | JN638752 | Mycobacterium | B1 | 68600 | 98  | 66.4 |
| Mutante        | MH399780 | Mycobacterium | B1 | 68494 | 103 | 66.5 |
| Nacho          | JX649098 | Mycobacterium | B1 | 69321 | 104 | 66.6 |
| Newman         | KC691258 | Mycobacterium | B1 | 68598 | 97  | 66.5 |
| Numberten      | KJ194583 | Mycobacterium | B1 | 68607 | 102 | 66.5 |
| Oline          | JN192463 | Mycobacterium | B1 | 68720 | 101 | 66.4 |
| Olive          | MH077582 | Mycobacterium | B1 | 68740 | 98  | 66.5 |
| OliverWalter   | MG925356 | Mycobacterium | B1 | 68792 | 101 | 66.5 |
| Oosterbaan     | JF704109 | Mycobacterium | B1 | 68735 | 102 | 66.5 |
| Orion          | DQ398046 | Mycobacterium | B1 | 68427 | 100 | 66.5 |
| OSmaximus      | JN006064 | Mycobacterium | B1 | 69118 | 102 | 66.3 |
| PG1            | AF547430 | Mycobacterium | B1 | 68999 | 100 | 66.5 |
| Phamished      | KR816508 | Mycobacterium | B1 | 68515 | 101 | 66.5 |
| Phareon        | MH651184 | Mycobacterium | B1 | 68040 | 99  | 66.5 |
| PhatCats2014   | KX369585 | Mycobacterium | B1 | 69000 | 101 | 66.5 |
| PhenghisKhan   | MG757164 | Mycobacterium | B1 | 68727 | 102 | 66.3 |
| Phergie        | MG757165 | Mycobacterium | B1 | 68716 | 102 | 66.3 |
| Phipps         | JF704102 | Mycobacterium | B1 | 68293 | 99  | 66.5 |
| Phleuron       | MH316568 | Mycobacterium | B1 | 68527 | 99  | 66.4 |
| PhrankReynolds | MH155874 | Mycobacterium | B1 | 68721 | 100 | 66.3 |
| PhrodoBaggins  | MH399786 | Mycobacterium | B1 | 68873 | 104 | 66.4 |
| Phunky         | MF919528 | Mycobacterium | B1 | 68375 | 99  | 66.5 |
| Piglet         | JX649097 | Mycobacterium | B1 | 68992 | 101 | 66.5 |
| PinheadLarry   | MH590594 | Mycobacterium | B1 | 68390 | 100 | 66.4 |
| Pinkman        | KX702319 | Mycobacterium | B1 | 68938 | 101 | 66.4 |
| Pipsqueak      | KP027208 | Mycobacterium | B1 | 68328 | 99  | 66.5 |
| Placalicious   | MH479921 | Mycobacterium | B1 | 69085 | 99  | 66.5 |
| Podrick        | MH651186 | Mycobacterium | B1 | 68406 | 100 | 66.4 |
| Pops           | KR997967 | Mycobacterium | B1 | 68367 | 99  | 66.6 |
| Potter         | KU867907 | Mycobacterium | B1 | 68327 | 96  | 66.5 |
| ProfessorX     | MG962375 | Mycobacterium | B1 | 68086 | 99  | 66.5 |
| Puhltonio      | GQ303264 | Mycobacterium | B1 | 68323 | 97  | 66.4 |
| Roy17          | MH513980 | Mycobacterium | B1 | 68056 | 99  | 66.6 |
| Scoot17C       | GU247134 | Mycobacterium | B1 | 68432 | 102 | 66.5 |
| SDcharge11     | KC661274 | Mycobacterium | B1 | 67702 | 100 | 66.5 |
| Serendipity    | JN006063 | Mycobacterium | B1 | 68804 | 101 | 66.5 |
| Serpentine     | JX649096 | Mycobacterium | B1 | 68884 | 104 | 66.5 |
| Sheila         | MF919530 | Mycobacterium | B1 | 67880 | 96  | 66.5 |
| ShiVal         | KC576784 | Mycobacterium | B1 | 68355 | 101 | 66.5 |
| Sigman         | KP027209 | Mycobacterium | B1 | 68311 | 101 | 66.5 |
| Soto           | KJ174157 | Mycobacterium | B1 | 67744 | 98  | 66.6 |
| Squid          | KT599441 | Mycobacterium | B1 | 68596 | 101 | 66.5 |
| Suffolk        | KF713485 | Mycobacterium | B1 | 68262 | 97  | 66.6 |
| Swish          | KJ194579 | Mycobacterium | B1 | 68735 | 103 | 66.5 |
| TallGrassMM    | JN699010 | Mycobacterium | B1 | 68133 | 100 | 66.5 |
| Thora          | JF957056 | Mycobacterium | B1 | 68839 | 100 | 66.5 |



|               |          |               |    |       |     |      |
|---------------|----------|---------------|----|-------|-----|------|
| ThreeOh3D2    | JN699009 | Mycobacterium | B1 | 68992 | 103 | 66.5 |
| Trypo         | MG944223 | Mycobacterium | B1 | 68798 | 101 | 66.4 |
| TyrionL       | KX576646 | Mycobacterium | B1 | 68637 | 102 | 66.4 |
| UAch1         | MH576967 | Mycobacterium | B1 | 68405 | 102 | 66.4 |
| UncleHowie    | GQ303266 | Mycobacterium | B1 | 68016 | 98  | 66.5 |
| Vaticameos    | MH590588 | Mycobacterium | B1 | 66887 | 99  | 66.5 |
| Virapocalypse | MF919539 | Mycobacterium | B1 | 68682 | 103 | 66.5 |
| Vista         | JN699008 | Mycobacterium | B1 | 68494 | 101 | 66.5 |
| Vivaldi       | KM347890 | Mycobacterium | B1 | 68873 | 102 | 66.4 |
| Vortex        | JF704103 | Mycobacterium | B1 | 68346 | 99  | 66.5 |
| Waterdiva     | MH779516 | Mycobacterium | B1 | 68866 | 103 | 66.5 |
| Xavier        | MG944225 | Mycobacterium | B1 | 68493 | 101 | 66.4 |
| Yoshand       | JF937109 | Mycobacterium | B1 | 68719 | 103 | 66.5 |
| Zonia         | KM363597 | Mycobacterium | B1 | 69271 | 102 | 66.3 |
| Arbiter       | JN618996 | Mycobacterium | B2 | 67169 | 88  | 68.9 |
| Ares          | JN699004 | Mycobacterium | B2 | 67436 | 92  | 69.0 |
| Boyle         | MH051249 | Mycobacterium | B2 | 67491 | 92  | 69.0 |
| Eaglehorse    | MH727546 | Mycobacterium | B2 | 67391 | 93  | 69.0 |
| FrenchFry     | MH697584 | Mycobacterium | B2 | 67494 | 93  | 68.9 |
| Glass         | KT880194 | Mycobacterium | B2 | 67509 | 94  | 69.0 |
| Godines       | KR997932 | Mycobacterium | B2 | 67277 | 91  | 69.0 |
| Hedgerow      | JN698991 | Mycobacterium | B2 | 67451 | 92  | 69.0 |
| Holeinone     | MG812490 | Mycobacterium | B2 | 67044 | 91  | 68.9 |
| ItsyBitsy1    | MG812491 | Mycobacterium | B2 | 67570 | 89  | 68.9 |
| Kheth         | MH001452 | Mycobacterium | B2 | 67406 | 92  | 68.9 |
| Laurie        | KX443696 | Mycobacterium | B2 | 66507 | 90  | 69.0 |
| LizLemon      | KM101117 | Mycobacterium | B2 | 67496 | 92  | 68.9 |
| Opia          | MG757162 | Mycobacterium | B2 | 67401 | 93  | 68.9 |
| Qyrzula       | DQ398048 | Mycobacterium | B2 | 67188 | 81  | 69.0 |
| Rosebush      | AY129334 | Mycobacterium | B2 | 67480 | 90  | 69.0 |
| Sabella       | MH590591 | Mycobacterium | B2 | 67304 | 92  | 68.9 |
| TA17a         | KF024722 | Mycobacterium | B2 | 67324 | 95  | 69.0 |
| Tres          | KT365402 | Mycobacterium | B2 | 67349 | 92  | 68.9 |
| Akoma         | JN699006 | Mycobacterium | B3 | 68711 | 104 | 67.5 |
| Athena        | JN699003 | Mycobacterium | B3 | 69409 | 105 | 67.5 |
| Audrey        | KJ194581 | Mycobacterium | B3 | 68662 | 103 | 67.5 |
| Baloo         | MG920059 | Mycobacterium | B3 | 68514 | 102 | 67.5 |
| Bernardo      | KF493879 | Mycobacterium | B3 | 68196 | 100 | 67.4 |
| ChaChing      | MG925338 | Mycobacterium | B3 | 68668 | 103 | 67.5 |
| Chandler      | KP027207 | Mycobacterium | B3 | 69451 | 103 | 67.5 |
| Corofin       | KR080205 | Mycobacterium | B3 | 68685 | 103 | 67.5 |
| Daisy         | JF704095 | Mycobacterium | B3 | 68245 | 102 | 67.6 |
| Gadget        | JN698992 | Mycobacterium | B3 | 67949 | 102 | 67.5 |
| Heathcliff    | KJ194584 | Mycobacterium | B3 | 68628 | 103 | 67.5 |
| Kamiyu        | JN699018 | Mycobacterium | B3 | 68633 | 103 | 67.5 |
| Mortcellus    | MH316565 | Mycobacterium | B3 | 69800 | 103 | 67.5 |
| Morty007      | MH513976 | Mycobacterium | B3 | 69431 | 101 | 67.5 |
| Nozo          | MG925353 | Mycobacterium | B3 | 69439 | 103 | 67.5 |
| OrangeOswald  | KR080203 | Mycobacterium | B3 | 68674 | 102 | 67.5 |

|               |          |               |    |        |     |      |
|---------------|----------|---------------|----|--------|-----|------|
| Phaedrus      | EU816589 | Mycobacterium | B3 | 68090  | 98  | 67.6 |
| Phlyer        | FJ641182 | Mycobacterium | B3 | 69378  | 103 | 67.5 |
| Pipefish      | DQ398049 | Mycobacterium | B3 | 69059  | 102 | 67.3 |
| RagingRooster | MG839014 | Mycobacterium | B3 | 68670  | 103 | 67.6 |
| Tydolla       | MH576977 | Mycobacterium | B3 | 68657  | 99  | 67.5 |
| Yahalom       | MH051265 | Mycobacterium | B3 | 68482  | 101 | 67.4 |
| AlanGrant     | KR080200 | Mycobacterium | B4 | 72109  | 99  | 68.9 |
| BrownCNA      | KT270441 | Mycobacterium | B4 | 71214  | 97  | 68.9 |
| ChrisnMich    | JF704094 | Mycobacterium | B4 | 70428  | 100 | 69.1 |
| Cooper        | DQ398044 | Mycobacterium | B4 | 70654  | 99  | 69.1 |
| Fortunato     | KX589269 | Mycobacterium | B4 | 70679  | 94  | 69.0 |
| Hangman       | MH513970 | Mycobacterium | B4 | 71376  | 97  | 68.9 |
| JAMaL         | KF493881 | Mycobacterium | B4 | 70841  | 98  | 68.8 |
| Nigel         | EU770221 | Mycobacterium | B4 | 69904  | 94  | 68.3 |
| Stinger       | JN699011 | Mycobacterium | B4 | 69641  | 95  | 68.6 |
| Vincenzo      | KR080194 | Mycobacterium | B4 | 72139  | 98  | 68.9 |
| Zemanar       | JF704104 | Mycobacterium | B4 | 71092  | 95  | 68.9 |
| Acadian       | JN699007 | Mycobacterium | B5 | 69864  | 97  | 68.4 |
| Baee          | KR080199 | Mycobacterium | B5 | 70270  | 96  | 67.6 |
| Phelemich     | KF416341 | Mycobacterium | B5 | 70115  | 95  | 68.3 |
| Reprobate     | KF024727 | Mycobacterium | B5 | 70120  | 97  | 68.3 |
| Rich          | KY224000 | Mycobacterium | B5 | 69819  | 95  | 67.6 |
| Serendipitous | MH727561 | Mycobacterium | B5 | 69867  | 98  | 68.0 |
| 39HC          | KJ433973 | Mycobacterium | B6 | 71565  | 100 | 70.0 |
| 40BC          | KJ433975 | Mycobacterium | B6 | 71565  | 100 | 70.0 |
| Hosp          | KJ433974 | Mycobacterium | B6 | 70667  | 97  | 69.9 |
| Jolie1        | KJ433976 | Mycobacterium | B6 | 71058  | 98  | 69.9 |
| KayaCho       | KF024729 | Mycobacterium | B6 | 70838  | 95  | 70.0 |
| Saguaro       | MH744423 | Mycobacterium | B7 | 69448  | 93  | 69.5 |
| Thonko        | MH632120 | Mycobacterium | B8 | 69471  | 108 | 68.6 |
| Alice         | JF704092 | Mycobacterium | C1 | 153401 | 222 | 64.7 |
| ArcherS7      | KC748970 | Mycobacterium | C1 | 156558 | 237 | 64.7 |
| Astraea       | KC691257 | Mycobacterium | C1 | 154872 | 232 | 64.7 |
| Audrick       | MF919493 | Mycobacterium | C1 | 155205 | 235 | 64.7 |
| Ava3          | JQ911768 | Mycobacterium | C1 | 154466 | 232 | 64.8 |
| Bangla1971    | MH825697 | Mycobacterium | C1 | 154722 | 235 | 64.7 |
| BeanWater     | MF919494 | Mycobacterium | C1 | 154061 | 225 | 64.7 |
| Bigswole      | MF919495 | Mycobacterium | C1 | 156514 | 237 | 64.8 |
| Bread         | MH779498 | Mycobacterium | C1 | 153796 | 231 | 64.8 |
| Breeniome     | KF006817 | Mycobacterium | C1 | 154434 | 236 | 64.8 |
| Bxz1          | AY129337 | Mycobacterium | C1 | 156102 | 225 | 64.8 |
| Cali          | EU826471 | Mycobacterium | C1 | 155372 | 222 | 64.7 |
| Cane17        | MH697579 | Mycobacterium | C1 | 160330 | 223 | 64.6 |
| Catera        | DQ398053 | Mycobacterium | C1 | 153766 | 218 | 64.7 |
| CharlieB      | MH727543 | Mycobacterium | C1 | 155886 | 232 | 64.7 |
| Daffodil      | MF919499 | Mycobacterium | C1 | 155034 | 238 | 64.7 |
| Dandelion     | JN412588 | Mycobacterium | C1 | 157568 | 238 | 64.7 |
| Derek         | MH316561 | Mycobacterium | C1 | 156199 | 229 | 64.7 |
| Drazdys       | JF704116 | Mycobacterium | C1 | 156281 | 230 | 64.7 |

|              |          |               |    |        |     |      |
|--------------|----------|---------------|----|--------|-----|------|
| DTDevon      | KT365398 | Mycobacterium | C1 | 156754 | 233 | 64.6 |
| Erdmann      | KX721256 | Mycobacterium | C1 | 155565 | 233 | 64.7 |
| ErnieJ       | KT365400 | Mycobacterium | C1 | 153243 | 226 | 64.7 |
| ET08         | GQ303260 | Mycobacterium | C1 | 155445 | 218 | 64.6 |
| FudgeTart    | MH779502 | Mycobacterium | C1 | 154658 | 232 | 64.8 |
| Gabriel      | KX781992 | Mycobacterium | C1 | 154474 | 233 | 64.8 |
| Ghost        | JF704096 | Mycobacterium | C1 | 155167 | 231 | 64.6 |
| Gizmo        | KC748968 | Mycobacterium | C1 | 157482 | 241 | 64.6 |
| HyRo         | KT281790 | Mycobacterium | C1 | 153714 | 224 | 64.7 |
| InigoMontoya | MH697586 | Mycobacterium | C1 | 155217 | 237 | 64.7 |
| InterFolia   | MH051260 | Mycobacterium | C1 | 156221 | 237 | 64.7 |
| Koguma       | MF919513 | Mycobacterium | C1 | 155759 | 230 | 64.7 |
| LifeSavor    | MG872839 | Mycobacterium | C1 | 156804 | 233 | 64.6 |
| LinStu       | JN412592 | Mycobacterium | C1 | 153882 | 226 | 64.8 |
| Littleton    | KX369583 | Mycobacterium | C1 | 155800 | 236 | 64.7 |
| LRRHood      | GQ303262 | Mycobacterium | C1 | 154349 | 224 | 64.7 |
| Lukilu       | KX831080 | Mycobacterium | C1 | 157034 | 221 | 64.7 |
| Megamind     | MH669008 | Mycobacterium | C1 | 154780 | 230 | 64.8 |
| MikeLiesIn   | MH051266 | Mycobacterium | C1 | 155916 | 234 | 64.7 |
| Momo         | KR080196 | Mycobacterium | C1 | 154553 | 232 | 64.7 |
| MoMoMixon    | JN699626 | Mycobacterium | C1 | 154573 | 228 | 64.8 |
| Nappy        | JN699627 | Mycobacterium | C1 | 156646 | 232 | 64.7 |
| NuevoMundo   | MG812493 | Mycobacterium | C1 | 155943 | 236 | 64.7 |
| ParkTD       | MH316567 | Mycobacterium | C1 | 155006 | 234 | 64.8 |
| Phlegm       | MH697590 | Mycobacterium | C1 | 155959 | 238 | 64.7 |
| Phox         | MF919527 | Mycobacterium | C1 | 154874 | 229 | 64.7 |
| Pier         | MG812494 | Mycobacterium | C1 | 156471 | 234 | 64.7 |
| Pio          | JN699013 | Mycobacterium | C1 | 156758 | 238 | 64.8 |
| Pleione      | JN624850 | Mycobacterium | C1 | 155586 | 236 | 64.7 |
| Rabinovish   | MH590593 | Mycobacterium | C1 | 154861 | 229 | 64.7 |
| Rizal        | EU826467 | Mycobacterium | C1 | 153894 | 220 | 64.7 |
| Roots515     | MH744422 | Mycobacterium | C1 | 156288 | 237 | 64.7 |
| Salacia      | MH727558 | Mycobacterium | C1 | 156610 | 237 | 64.7 |
| ScottMcG     | EU826469 | Mycobacterium | C1 | 154017 | 221 | 64.8 |
| Sebata       | JN204348 | Mycobacterium | C1 | 155286 | 230 | 64.8 |
| Shrimp       | KF024734 | Mycobacterium | C1 | 155714 | 235 | 64.7 |
| Spud         | EU826468 | Mycobacterium | C1 | 154906 | 222 | 64.8 |
| Tonenili     | KX752698 | Mycobacterium | C1 | 160985 | 258 | 64.1 |
| Tyke         | MH051261 | Mycobacterium | C1 | 156679 | 231 | 64.7 |
| Wally        | JN699625 | Mycobacterium | C1 | 155299 | 228 | 64.7 |
| Willis       | KJ595575 | Mycobacterium | C1 | 155476 | 233 | 64.7 |
| Yucca        | KX721255 | Mycobacterium | C1 | 155582 | 232 | 64.7 |
| Zalkecks     | MH825713 | Mycobacterium | C1 | 154764 | 234 | 64.7 |
| Zeenon       | KT321476 | Mycobacterium | C1 | 155292 | 232 | 64.7 |
| ZygoTaiga    | KM881426 | Mycobacterium | C1 | 157204 | 231 | 64.7 |
| Myrna        | EU826466 | Mycobacterium | C2 | 164602 | 229 | 65.4 |
| Phabba       | MF668280 | Mycobacterium | C2 | 164254 | 244 | 65.2 |
| Adjutor      | EU676000 | Mycobacterium | D1 | 64511  | 86  | 59.7 |
| BigMama      | MH025888 | Mycobacterium | D1 | 64592  | 87  | 59.7 |

|               |          |               |    |       |     |      |
|---------------|----------|---------------|----|-------|-----|------|
| Butterscotch  | FJ168660 | Mycobacterium | D1 | 64562 | 86  | 59.7 |
| Erk16         | MH316562 | Mycobacterium | D1 | 64877 | 89  | 59.6 |
| Gumball       | FJ168661 | Mycobacterium | D1 | 64807 | 88  | 59.6 |
| KandZ         | MH834615 | Mycobacterium | D1 | 64596 | 86  | 59.7 |
| Nova          | JN699014 | Mycobacterium | D1 | 65108 | 88  | 59.7 |
| PBI1          | DQ398047 | Mycobacterium | D1 | 64494 | 81  | 59.7 |
| PLot          | DQ398051 | Mycobacterium | D1 | 64787 | 89  | 59.7 |
| SirHarley     | JF937107 | Mycobacterium | D1 | 64791 | 90  | 59.6 |
| Troll4        | FJ168662 | Mycobacterium | D1 | 64618 | 88  | 59.6 |
| Visconti      | MH399788 | Mycobacterium | D1 | 64570 | 89  | 59.7 |
| Hawkeye       | KJ194582 | Mycobacterium | D2 | 67383 | 104 | 57.1 |
| 244           | DQ398041 | Mycobacterium | E  | 74483 | 142 | 62.9 |
| ABCat         | KF188414 | Mycobacterium | E  | 76131 | 143 | 63.0 |
| Adnama        | MH371112 | Mycobacterium | E  | 75208 | 148 | 62.9 |
| Asriel        | MG872831 | Mycobacterium | E  | 74594 | 142 | 62.8 |
| Barbarian     | MG872832 | Mycobacterium | E  | 74594 | 144 | 62.8 |
| Bask21        | JF937091 | Mycobacterium | E  | 74997 | 147 | 62.9 |
| Bruin         | KF562099 | Mycobacterium | E  | 74210 | 141 | 63.0 |
| Cjw1          | AY129331 | Mycobacterium | E  | 75931 | 141 | 63.1 |
| Contagion     | KF024732 | Mycobacterium | E  | 74533 | 140 | 63.1 |
| CrystalP      | KY319168 | Mycobacterium | E  | 76483 | 143 | 63.0 |
| DoctorDiddles | MH399774 | Mycobacterium | E  | 75070 | 143 | 62.8 |
| DrDrey        | KF306380 | Mycobacterium | E  | 77367 | 144 | 63.0 |
| Dumbo         | KC691255 | Mycobacterium | E  | 75736 | 147 | 63.0 |
| Dusk          | KT222942 | Mycobacterium | E  | 75339 | 142 | 63.0 |
| Easy2Say      | MH651174 | Mycobacterium | E  | 75598 | 146 | 62.9 |
| Elph10        | JN391441 | Mycobacterium | E  | 74675 | 143 | 63.0 |
| Emmina        | MH669002 | Mycobacterium | E  | 75295 | 146 | 62.9 |
| Eureka        | JN412590 | Mycobacterium | E  | 76174 | 145 | 62.9 |
| FireRed       | MF919506 | Mycobacterium | E  | 76217 | 148 | 63.0 |
| Gage          | MG872837 | Mycobacterium | E  | 71650 | 135 | 63.2 |
| Gemini        | MH779503 | Mycobacterium | E  | 75649 | 149 | 62.9 |
| Glexan        | MH536820 | Mycobacterium | E  | 76498 | 148 | 62.9 |
| Goku          | KF416343 | Mycobacterium | E  | 76483 | 143 | 62.8 |
| Henry         | JF937096 | Mycobacterium | E  | 76049 | 143 | 63.0 |
| Hopey         | MH576953 | Mycobacterium | E  | 75586 | 142 | 63.0 |
| HufflyPuff    | KF562100 | Mycobacterium | E  | 76323 | 146 | 63.1 |
| Icee          | MH399778 | Mycobacterium | E  | 74169 | 144 | 63.0 |
| IHOP          | MH513972 | Mycobacterium | E  | 75668 | 149 | 62.9 |
| Inca          | MH576956 | Mycobacterium | E  | 74070 | 145 | 62.8 |
| Kimchi        | MG757160 | Mycobacterium | E  | 75829 | 149 | 62.9 |
| Kostya        | EU816591 | Mycobacterium | E  | 75811 | 143 | 62.9 |
| Lilac         | JN382248 | Mycobacterium | E  | 76260 | 140 | 63.0 |
| MadamMonkfish | MF668277 | Mycobacterium | E  | 75554 | 146 | 63.0 |
| Maxxinista    | KY549152 | Mycobacterium | E  | 75215 | 146 | 63.0 |
| Mindy         | KR080204 | Mycobacterium | E  | 75796 | 147 | 63.0 |
| MISSy         | MF919524 | Mycobacterium | E  | 75808 | 145 | 63.1 |
| Mosby         | KF493883 | Mycobacterium | E  | 74533 | 141 | 63.1 |
| MPhalcon      | MH020247 | Mycobacterium | E  | 75605 | 146 | 63.1 |

|                |          |               |    |       |     |      |
|----------------|----------|---------------|----|-------|-----|------|
| Murica         | MF919525 | Mycobacterium | E  | 77053 | 147 | 63.0 |
| Murphy         | KC748971 | Mycobacterium | E  | 76179 | 146 | 62.9 |
| Nala           | KF562101 | Mycobacterium | E  | 75894 | 147 | 63.1 |
| NelitzaMV      | KT222941 | Mycobacterium | E  | 72790 | 139 | 63.1 |
| NoSleep        | KT020852 | Mycobacterium | E  | 74655 | 143 | 63.0 |
| Paperbeatsrock | MH727557 | Mycobacterium | E  | 75640 | 142 | 63.0 |
| Phaja          | MH513978 | Mycobacterium | E  | 75685 | 149 | 62.9 |
| Pharsalus      | KX611831 | Mycobacterium | E  | 75779 | 142 | 63.0 |
| PhatBacter     | KF562102 | Mycobacterium | E  | 76217 | 148 | 63.0 |
| Phaux          | KC748969 | Mycobacterium | E  | 76479 | 145 | 62.9 |
| Phrux          | KC661277 | Mycobacterium | E  | 74711 | 141 | 63.1 |
| Porky          | EU816588 | Mycobacterium | E  | 76312 | 147 | 62.8 |
| Pumpkin        | GQ303265 | Mycobacterium | E  | 74491 | 143 | 63.0 |
| Rakim          | JN006062 | Mycobacterium | E  | 75706 | 145 | 62.9 |
| RiverMonster   | MH000607 | Mycobacterium | E  | 75565 | 144 | 63.1 |
| Sassay         | MF919529 | Mycobacterium | E  | 73495 | 139 | 63.0 |
| ShereKhan      | MH513983 | Mycobacterium | E  | 76133 | 143 | 63.1 |
| Simpliphy      | MH536827 | Mycobacterium | E  | 75366 | 145 | 63.0 |
| SirDuracell    | JF937106 | Mycobacterium | E  | 75973 | 145 | 62.9 |
| Sotrice96      | MG872843 | Mycobacterium | E  | 76299 | 149 | 63.1 |
| TBrady12       | MH536829 | Mycobacterium | E  | 75359 | 149 | 62.8 |
| TeardropMSU    | KU865303 | Mycobacterium | E  | 74896 | 143 | 63.0 |
| Terminus       | MF919535 | Mycobacterium | E  | 76169 | 147 | 63.1 |
| Toto           | JN006061 | Mycobacterium | E  | 75933 | 140 | 63.0 |
| Tuco           | KX817173 | Mycobacterium | E  | 76944 | 148 | 63.0 |
| Ukulele        | KT373978 | Mycobacterium | E  | 75114 | 141 | 63.0 |
| Willez         | MF919540 | Mycobacterium | E  | 74576 | 142 | 62.9 |
| xkcd           | MH590587 | Mycobacterium | E  | 76915 | 149 | 62.8 |
| YassJohnny     | MF919541 | Mycobacterium | E  | 73697 | 139 | 62.9 |
| Youngblood     | MG099953 | Mycobacterium | E  | 75896 | 148 | 62.9 |
| Renaud18       | MH651187 | Mycobacterium | F  | 58078 | 112 | 61.7 |
| Alexphander    | MG962361 | Mycobacterium | F1 | 57734 | 104 | 61.2 |
| ArcusAngelus   | MH744415 | Mycobacterium | F1 | 58569 | 104 | 61.4 |
| Ardmore        | GU060500 | Mycobacterium | F1 | 52141 | 87  | 61.5 |
| Batiatus       | MH020235 | Mycobacterium | F1 | 57737 | 105 | 61.8 |
| BigPhil        | MH051248 | Mycobacterium | F1 | 53618 | 100 | 61.5 |
| Bipolar        | KM597530 | Mycobacterium | F1 | 58985 | 106 | 61.4 |
| BobaPhett      | MH155865 | Mycobacterium | F1 | 59815 | 108 | 61.3 |
| Bobi           | KF114874 | Mycobacterium | F1 | 59179 | 107 | 61.7 |
| Boomer         | EU816590 | Mycobacterium | F1 | 58037 | 105 | 61.1 |
| Brocalys       | KU865302 | Mycobacterium | F1 | 54751 | 96  | 61.8 |
| Bubbles123     | KY348865 | Mycobacterium | F1 | 57647 | 100 | 61.4 |
| Burwell21      | MH651169 | Mycobacterium | F1 | 58098 | 100 | 61.5 |
| BuzzLyseyear   | KM347889 | Mycobacterium | F1 | 59419 | 110 | 61.1 |
| ByChance       | MH399771 | Mycobacterium | F1 | 53123 | 95  | 61.3 |
| Byougenkin     | MH155866 | Mycobacterium | F1 | 54685 | 101 | 61.4 |
| Cabrinians     | KT895281 | Mycobacterium | F1 | 56669 | 101 | 61.2 |
| CaptainTrips   | KM652553 | Mycobacterium | F1 | 57328 | 107 | 61.5 |
| Cerasum        | KM215148 | Mycobacterium | F1 | 53636 | 102 | 61.5 |

|                |          |               |    |       |     |      |
|----------------|----------|---------------|----|-------|-----|------|
| Che8           | AY129330 | Mycobacterium | F1 | 59471 | 112 | 61.3 |
| Clifton        | MH371115 | Mycobacterium | F1 | 55727 | 96  | 61.7 |
| Daenerys       | KF017005 | Mycobacterium | F1 | 58043 | 102 | 61.6 |
| Dante          | KT309034 | Mycobacterium | F1 | 59652 | 105 | 61.8 |
| DaWorst        | MF919501 | Mycobacterium | F1 | 56827 | 103 | 61.0 |
| DeadP          | JN698996 | Mycobacterium | F1 | 56461 | 106 | 61.6 |
| DillTech15     | MH077578 | Mycobacterium | F1 | 57797 | 111 | 61.9 |
| DLane          | JF937093 | Mycobacterium | F1 | 58899 | 105 | 61.9 |
| Dorothy        | JX411620 | Mycobacterium | F1 | 58866 | 104 | 61.4 |
| DotProduct     | JN859129 | Mycobacterium | F1 | 55363 | 98  | 61.8 |
| Drago          | JN542517 | Mycobacterium | F1 | 54411 | 103 | 61.2 |
| EleanorGeorge  | MH669001 | Mycobacterium | F1 | 59482 | 108 | 61.7 |
| Emma           | MF668270 | Mycobacterium | F1 | 56418 | 109 | 61.3 |
| Empress        | KY012363 | Mycobacterium | F1 | 57155 | 104 | 61.5 |
| Estave1        | KM279937 | Mycobacterium | F1 | 60727 | 112 | 61.3 |
| Florinda       | KR997930 | Mycobacterium | F1 | 59416 | 117 | 61.7 |
| Frankie        | MG812488 | Mycobacterium | F1 | 57036 | 103 | 61.9 |
| Fruitloop      | FJ174690 | Mycobacterium | F1 | 58471 | 102 | 61.8 |
| Galactic       | MH727548 | Mycobacterium | F1 | 57861 | 109 | 61.4 |
| Geralt         | MF668271 | Mycobacterium | F1 | 55765 | 97  | 61.5 |
| Girafales      | KR997931 | Mycobacterium | F1 | 58456 | 112 | 61.7 |
| Girr           | MH669003 | Mycobacterium | F1 | 57754 | 102 | 61.4 |
| Gorge          | MH590602 | Mycobacterium | F1 | 57955 | 103 | 61.4 |
| GUmbie         | JN398368 | Mycobacterium | F1 | 57387 | 104 | 61.4 |
| Hades          | KM101122 | Mycobacterium | F1 | 54986 | 102 | 61.4 |
| Hamulus        | KF024723 | Mycobacterium | F1 | 57155 | 105 | 61.8 |
| Harley         | MH632119 | Mycobacterium | F1 | 58731 | 107 | 61.4 |
| Ibhubesi       | JF937098 | Mycobacterium | F1 | 55600 | 103 | 61.2 |
| Inventum       | KM066034 | Mycobacterium | F1 | 57052 | 102 | 61.4 |
| Job42          | KC661280 | Mycobacterium | F1 | 59626 | 106 | 61.2 |
| JoeyJr         | MH669005 | Mycobacterium | F1 | 58962 | 107 | 61.4 |
| Kersh          | KX610764 | Mycobacterium | F1 | 60190 | 107 | 61.2 |
| Kimberlium     | KR935214 | Mycobacterium | F1 | 56826 | 105 | 61.4 |
| Kingsley       | KY702574 | Mycobacterium | F1 | 60300 | 112 | 61.4 |
| Koella         | MH316564 | Mycobacterium | F1 | 54118 | 95  | 61.5 |
| Krakatau       | MH590598 | Mycobacterium | F1 | 53058 | 97  | 61.5 |
| KristaRAM      | MH651178 | Mycobacterium | F1 | 58701 | 113 | 61.6 |
| Lizziana       | MH834617 | Mycobacterium | F1 | 58423 | 105 | 61.3 |
| Llama          | KM402757 | Mycobacterium | F1 | 58472 | 111 | 61.1 |
| Llij           | DQ398045 | Mycobacterium | F1 | 56852 | 100 | 61.5 |
| Mantra         | MH590596 | Mycobacterium | F1 | 57001 | 102 | 61.5 |
| Mattes         | MH155871 | Mycobacterium | F1 | 58074 | 105 | 61.3 |
| Melissauren88  | MH077580 | Mycobacterium | F1 | 54356 | 95  | 61.8 |
| MilleniumForce | MH825707 | Mycobacterium | F1 | 58106 | 104 | 61.8 |
| Misha28        | MH020242 | Mycobacterium | F1 | 57455 | 93  | 62.9 |
| Mozy           | JF937102 | Mycobacterium | F1 | 57278 | 108 | 61.1 |
| Mutaforma13    | JN020142 | Mycobacterium | F1 | 57701 | 106 | 61.3 |
| Nimbo          | MH669009 | Mycobacterium | F1 | 55767 | 96  | 61.5 |
| Nivrat         | MH651183 | Mycobacterium | F1 | 58009 | 103 | 61.5 |

|                |          |               |    |       |     |      |
|----------------|----------|---------------|----|-------|-----|------|
| NormanBulbieJr | MH399784 | Mycobacterium | F1 | 58102 | 102 | 61.3 |
| Ogopogo        | MG925354 | Mycobacterium | F1 | 56867 | 110 | 61.1 |
| OldBen         | MG770213 | Mycobacterium | F1 | 57159 | 101 | 61.5 |
| OlympiaSaint   | MH371120 | Mycobacterium | F1 | 58297 | 107 | 61.4 |
| Ovechkin       | KR824843 | Mycobacterium | F1 | 58338 | 106 | 62.0 |
| OwlsT2W        | MH051257 | Mycobacterium | F1 | 56515 | 103 | 61.2 |
| Pacc40         | FJ174692 | Mycobacterium | F1 | 58554 | 101 | 61.3 |
| PHappiness     | MH669010 | Mycobacterium | F1 | 57989 | 104 | 61.6 |
| Phasih         | MF919526 | Mycobacterium | F1 | 56125 | 100 | 61.1 |
| Phatniss       | KT279576 | Mycobacterium | F1 | 57293 | 101 | 61.3 |
| Pippy          | KY965064 | Mycobacterium | F1 | 56663 | 103 | 61.5 |
| PMC            | DQ398050 | Mycobacterium | F1 | 56692 | 104 | 61.4 |
| PopTart        | KT281792 | Mycobacterium | F1 | 55094 | 95  | 61.6 |
| Priscilla      | MG872841 | Mycobacterium | F1 | 58230 | 105 | 61.3 |
| QuickMath      | MH669012 | Mycobacterium | F1 | 57526 | 105 | 61.7 |
| Quico          | KR997968 | Mycobacterium | F1 | 58671 | 112 | 61.7 |
| Ramsey         | FJ174693 | Mycobacterium | F1 | 58578 | 108 | 61.2 |
| RitaG          | MF668281 | Mycobacterium | F1 | 57789 | 103 | 61.6 |
| RockyHorror    | JF704117 | Mycobacterium | F1 | 56719 | 107 | 61.1 |
| Ruby           | MH651188 | Mycobacterium | F1 | 57726 | 99  | 61.4 |
| Saal           | KJ025956 | Mycobacterium | F1 | 57775 | 101 | 61.3 |
| Sandalphon     | MH371123 | Mycobacterium | F1 | 59540 | 104 | 61.4 |
| SassyB         | KY471267 | Mycobacterium | F1 | 55094 | 95  | 61.6 |
| Seagreen       | KT281793 | Mycobacterium | F1 | 57766 | 105 | 61.8 |
| SG4            | JN699012 | Mycobacterium | F1 | 59016 | 105 | 61.9 |
| Shauna1        | JN020141 | Mycobacterium | F1 | 59315 | 107 | 61.7 |
| ShiLan         | JN020143 | Mycobacterium | F1 | 59794 | 107 | 61.4 |
| SimranZ1       | KY385384 | Mycobacterium | F1 | 56335 | 103 | 61.3 |
| SiSi           | KC661278 | Mycobacterium | F1 | 56279 | 99  | 61.5 |
| Sparkdehlily   | KT895280 | Mycobacterium | F1 | 56275 | 111 | 61.2 |
| Spartacus      | JQ300538 | Mycobacterium | F1 | 61164 | 110 | 61.7 |
| Spikelee       | MH669014 | Mycobacterium | F1 | 58604 | 104 | 61.0 |
| Spoonbill      | MF190168 | Mycobacterium | F1 | 55735 | 103 | 61.3 |
| SuperGrey      | KX808131 | Mycobacterium | F1 | 59346 | 103 | 61.7 |
| Taj            | JX121091 | Mycobacterium | F1 | 58550 | 110 | 61.9 |
| TootsiePop     | MH020243 | Mycobacterium | F1 | 57455 | 93  | 62.9 |
| Tweety         | EF536069 | Mycobacterium | F1 | 58692 | 109 | 61.7 |
| UncleRicky     | MH001448 | Mycobacterium | F1 | 57256 | 105 | 61.3 |
| Velveteen      | KF017004 | Mycobacterium | F1 | 54314 | 100 | 61.5 |
| Wachhund       | MF668287 | Mycobacterium | F1 | 54513 | 101 | 61.7 |
| Wee            | HQ728524 | Mycobacterium | F1 | 59230 | 109 | 61.8 |
| WillSterrel    | KX576644 | Mycobacterium | F1 | 58608 | 104 | 61.6 |
| XFactor        | KT281795 | Mycobacterium | F1 | 55617 | 95  | 61.7 |
| Avani          | JQ809702 | Mycobacterium | F2 | 54470 | 107 | 61.0 |
| Che9d          | AY129336 | Mycobacterium | F2 | 56275 | 111 | 60.9 |
| Demsculpinboyz | MF919502 | Mycobacterium | F2 | 57437 | 117 | 60.9 |
| Jabbawokkie    | KF017003 | Mycobacterium | F2 | 55213 | 106 | 61.1 |
| Yoshi          | JF704115 | Mycobacterium | F2 | 58714 | 116 | 61.0 |
| Zapner         | KJ567041 | Mycobacterium | F2 | 55307 | 108 | 61.1 |

|                |          |               |    |       |     |      |
|----------------|----------|---------------|----|-------|-----|------|
| Squirty        | KM101124 | Mycobacterium | F3 | 60285 | 102 | 62.4 |
| TChen          | MH077585 | Mycobacterium | F4 | 57742 | 101 | 62.3 |
| Angel          | FJ973624 | Mycobacterium | G1 | 41441 | 61  | 66.7 |
| Annihilator    | KT365399 | Mycobacterium | G1 | 41893 | 62  | 66.6 |
| Aroostook      | MF668268 | Mycobacterium | G1 | 41903 | 63  | 66.6 |
| Avrafan        | JN699002 | Mycobacterium | G1 | 41901 | 62  | 66.6 |
| BPs            | EU568876 | Mycobacterium | G1 | 41901 | 63  | 66.6 |
| BruceB         | KX443326 | Mycobacterium | G1 | 41901 | 63  | 66.6 |
| Cedasite       | KT355472 | Mycobacterium | G1 | 41901 | 63  | 66.6 |
| Chance64       | MF919497 | Mycobacterium | G1 | 41903 | 63  | 66.6 |
| Cherrybomb426  | MH590605 | Mycobacterium | G1 | 41456 | 62  | 66.7 |
| CLED96         | MH001456 | Mycobacterium | G1 | 41456 | 62  | 66.7 |
| DMoney         | MH371116 | Mycobacterium | G1 | 41880 | 61  | 66.6 |
| Frosty24       | KT355474 | Mycobacterium | G1 | 41901 | 63  | 66.6 |
| Gideon         | MF668272 | Mycobacterium | G1 | 41903 | 63  | 66.6 |
| Gomashi        | KM923970 | Mycobacterium | G1 | 41903 | 62  | 66.6 |
| Grizzly        | MH779505 | Mycobacterium | G1 | 41752 | 62  | 66.8 |
| Halo           | DQ398042 | Mycobacterium | G1 | 42289 | 64  | 66.7 |
| Hope           | GQ303261 | Mycobacterium | G1 | 41901 | 63  | 66.6 |
| Hotshotbaby7   | MH779507 | Mycobacterium | G1 | 41903 | 63  | 66.6 |
| Jane           | KX588251 | Mycobacterium | G1 | 41901 | 63  | 66.6 |
| Kasen3         | MH779509 | Mycobacterium | G1 | 41890 | 64  | 66.6 |
| Liefie         | JN412593 | Mycobacterium | G1 | 41650 | 61  | 66.8 |
| LouisV14       | MG099946 | Mycobacterium | G1 | 44145 | 65  | 66.6 |
| Mowgli         | MH479920 | Mycobacterium | G1 | 41902 | 63  | 66.6 |
| OctaviousRex   | MH371119 | Mycobacterium | G1 | 41880 | 62  | 66.6 |
| Olga           | MH779513 | Mycobacterium | G1 | 41902 | 64  | 66.6 |
| Paito          | MH779514 | Mycobacterium | G1 | 42311 | 68  | 66.0 |
| Phish          | MH077584 | Mycobacterium | G1 | 41901 | 62  | 66.6 |
| Phreak         | KT347314 | Mycobacterium | G1 | 41901 | 63  | 66.6 |
| Plagueis       | MH450127 | Mycobacterium | G1 | 41722 | 63  | 66.6 |
| Remy19         | MH001455 | Mycobacterium | G1 | 41901 | 63  | 66.6 |
| Schiebel       | MH045569 | Mycobacterium | G1 | 41441 | 61  | 66.7 |
| Sneeze         | KX534004 | Mycobacterium | G1 | 42429 | 64  | 66.5 |
| Sweets         | MH779515 | Mycobacterium | G1 | 41896 | 63  | 66.6 |
| Taheera        | KX641265 | Mycobacterium | G1 | 41077 | 60  | 66.4 |
| Terror         | KX641266 | Mycobacterium | G1 | 41077 | 60  | 66.4 |
| Zombie         | KX664455 | Mycobacterium | G1 | 41901 | 63  | 66.6 |
| Avocado        | MF141540 | Mycobacterium | G2 | 45389 | 68  | 68.7 |
| Cambiare       | KR080198 | Mycobacterium | G2 | 45161 | 67  | 68.8 |
| FlagStaff      | KR080197 | Mycobacterium | G2 | 44576 | 65  | 68.5 |
| MOOREtheMARYer | KR080202 | Mycobacterium | G3 | 44492 | 67  | 68.6 |
| Jolie2         | KJ410133 | Mycobacterium | G4 | 44306 | 62  | 68.1 |
| Cborch11       | MH509445 | Mycobacterium | H1 | 68508 | 94  | 57.6 |
| Damien         | KJ567046 | Mycobacterium | H1 | 68386 | 93  | 57.6 |
| Konstantine    | FJ174691 | Mycobacterium | H1 | 68952 | 95  | 57.3 |
| Oaker          | KF986247 | Mycobacterium | H1 | 69099 | 92  | 57.5 |
| Predator       | EU770222 | Mycobacterium | H1 | 70110 | 92  | 56.3 |
| Thumb          | MG962376 | Mycobacterium | H1 | 68408 | 94  | 57.5 |



|               |          |               |    |        |     |      |
|---------------|----------|---------------|----|--------|-----|------|
| Barnyard      | AY129339 | Mycobacterium | H2 | 70797  | 109 | 57.3 |
| Babsiella     | JN699001 | Mycobacterium | I1 | 48420  | 78  | 67.1 |
| Brujita       | FJ168659 | Mycobacterium | I1 | 47057  | 74  | 66.8 |
| Island3       | HM152765 | Mycobacterium | I1 | 47287  | 76  | 66.8 |
| Che9c         | AY129333 | Mycobacterium | I2 | 57050  | 84  | 65.4 |
| Sbash         | KP027201 | Mycobacterium | I2 | 55832  | 89  | 65.6 |
| Ariel         | KM400683 | Mycobacterium | J  | 109801 | 245 | 61.0 |
| BAKA          | JF937090 | Mycobacterium | J  | 111688 | 242 | 60.7 |
| Constella     | MH399772 | Mycobacterium | J  | 110169 | 228 | 60.8 |
| Courthouse    | JN698997 | Mycobacterium | J  | 110569 | 241 | 60.9 |
| DmpstrDiver   | MF919504 | Mycobacterium | J  | 112285 | 241 | 60.6 |
| Ejimax        | MH697582 | Mycobacterium | J  | 111924 | 234 | 60.9 |
| EricMillard   | MH697583 | Mycobacterium | J  | 113536 | 239 | 60.9 |
| Halley        | MH077579 | Mycobacterium | J  | 112351 | 245 | 60.8 |
| Kalah2        | MH727551 | Mycobacterium | J  | 110713 | 230 | 61.0 |
| Klein         | MF919512 | Mycobacterium | J  | 112329 | 248 | 60.8 |
| LittleE       | JF937101 | Mycobacterium | J  | 109086 | 229 | 61.3 |
| Lucky2013     | MF133445 | Mycobacterium | J  | 108627 | 237 | 61.1 |
| MiaZeal       | KM925136 | Mycobacterium | J  | 110764 | 250 | 61.2 |
| Minerva       | KM101123 | Mycobacterium | J  | 109871 | 238 | 60.7 |
| Omega         | AY129338 | Mycobacterium | J  | 110865 | 237 | 61.4 |
| Optimus       | JF957059 | Mycobacterium | J  | 109270 | 230 | 60.8 |
| Porcelain     | MF072690 | Mycobacterium | J  | 109575 | 241 | 61.2 |
| Redno2        | KF114875 | Mycobacterium | J  | 108297 | 231 | 60.9 |
| Squint        | MF668284 | Mycobacterium | J  | 110240 | 238 | 61.0 |
| Superphikiman | MF919534 | Mycobacterium | J  | 109799 | 239 | 61.0 |
| Thibault      | JN201525 | Mycobacterium | J  | 106327 | 216 | 60.8 |
| Wanda         | KF006818 | Mycobacterium | J  | 109960 | 240 | 60.8 |
| Zelink        | MH669017 | Mycobacterium | J  | 111740 | 236 | 60.8 |
| ActinUp       | MH051246 | Mycobacterium | K1 | 59812  | 96  | 66.6 |
| Adephagia     | JF704105 | Mycobacterium | K1 | 59646  | 94  | 66.6 |
| Adonis        | MH001453 | Mycobacterium | K1 | 60031  | 95  | 66.7 |
| AlishaPH      | MH077577 | Mycobacterium | K1 | 57034  | 88  | 66.6 |
| Amelie        | KX808132 | Mycobacterium | K1 | 56439  | 77  | 67.1 |
| Anaya         | JF704106 | Mycobacterium | K1 | 60835  | 98  | 66.4 |
| Angelica      | HM152764 | Mycobacterium | K1 | 59598  | 94  | 66.4 |
| Apocalypse    | MF668267 | Mycobacterium | K1 | 59947  | 98  | 66.4 |
| BarrelRoll    | JN643714 | Mycobacterium | K1 | 59672  | 95  | 66.6 |
| BEEST         | MH509444 | Mycobacterium | K1 | 59906  | 95  | 66.6 |
| Beezoo        | MH371113 | Mycobacterium | K1 | 60494  | 99  | 66.5 |
| Bella96       | MF377440 | Mycobacterium | K1 | 60746  | 97  | 66.1 |
| Belladonna    | MH697578 | Mycobacterium | K1 | 59708  | 96  | 66.6 |
| Biglebops     | MH399770 | Mycobacterium | K1 | 56454  | 77  | 67.1 |
| CREW          | KY380102 | Mycobacterium | K1 | 59707  | 94  | 66.6 |
| CrimD         | HM152767 | Mycobacterium | K1 | 59798  | 95  | 66.9 |
| Dalmuri       | MH727544 | Mycobacterium | K1 | 59708  | 96  | 66.5 |
| Deby          | MG962364 | Mycobacterium | K1 | 60463  | 95  | 66.5 |
| DrHayes       | KX657795 | Mycobacterium | K1 | 60526  | 97  | 66.2 |
| Emerson       | KJ567045 | Mycobacterium | K1 | 60310  | 100 | 66.6 |

|                |          |               |    |       |     |      |
|----------------|----------|---------------|----|-------|-----|------|
| Enkosi         | KT281789 | Mycobacterium | K1 | 59052 | 79  | 67.2 |
| HedwigODU      | KX585253 | Mycobacterium | K1 | 59812 | 95  | 66.6 |
| Homura         | MH536821 | Mycobacterium | K1 | 59708 | 94  | 66.6 |
| JAWS           | JN185608 | Mycobacterium | K1 | 59749 | 94  | 66.6 |
| Jeckyll        | MF140412 | Mycobacterium | K1 | 59708 | 96  | 66.6 |
| Joy99          | MH536822 | Mycobacterium | K1 | 59837 | 97  | 66.6 |
| LastHope       | MF140416 | Mycobacterium | K1 | 60934 | 102 | 66.9 |
| LaterM         | MG962371 | Mycobacterium | K1 | 60143 | 95  | 66.5 |
| LilPharaoh     | MF919518 | Mycobacterium | K1 | 56167 | 78  | 67.1 |
| LindNT         | KX641264 | Mycobacterium | K1 | 60053 | 93  | 66.8 |
| Murucutumbu    | KM677211 | Mycobacterium | K1 | 60609 | 95  | 66.7 |
| Mynx           | MH513977 | Mycobacterium | K1 | 60055 | 96  | 66.6 |
| Peanam         | MF185722 | Mycobacterium | K1 | 61041 | 98  | 68.5 |
| SamuelLPlaqsom | KX657794 | Mycobacterium | K1 | 60526 | 97  | 66.2 |
| SgtBeansprout  | MH020245 | Mycobacterium | K1 | 56439 | 78  | 67.1 |
| Slimphazie     | MF140428 | Mycobacterium | K1 | 60143 | 98  | 66.6 |
| Sulley         | MF919532 | Mycobacterium | K1 | 59873 | 94  | 66.4 |
| Tachez         | MF140430 | Mycobacterium | K1 | 59556 | 96  | 66.5 |
| TreyKay        | MF472892 | Mycobacterium | K1 | 60311 | 97  | 66.8 |
| Urkel          | KX657796 | Mycobacterium | K1 | 60526 | 97  | 66.2 |
| Validus        | KF713486 | Mycobacterium | K1 | 62466 | 105 | 68.4 |
| BoostSeason    | MH834601 | Mycobacterium | K2 | 58078 | 94  | 68.2 |
| DismalFunk     | MF140408 | Mycobacterium | K2 | 58129 | 94  | 68.3 |
| DismalStressor | MH727545 | Mycobacterium | K2 | 58129 | 94  | 68.3 |
| Findley        | MF140411 | Mycobacterium | K2 | 58150 | 94  | 68.3 |
| Marcoliusprime | KX688047 | Mycobacterium | K2 | 58129 | 92  | 68.2 |
| Milly          | KP027206 | Mycobacterium | K2 | 58211 | 94  | 68.3 |
| Mufasa         | KT591490 | Mycobacterium | K2 | 58065 | 94  | 68.2 |
| TM4            | AF068845 | Mycobacterium | K2 | 52797 | 92  | 68.1 |
| ZoeJ           | KJ510412 | Mycobacterium | K2 | 57315 | 92  | 68.5 |
| Hurricane      | MF373841 | Mycobacterium | K3 | 61318 | 98  | 67.1 |
| Keshu          | KP027199 | Mycobacterium | K3 | 61251 | 101 | 67.3 |
| MacnCheese     | JX042579 | Mycobacterium | K3 | 61567 | 99  | 67.3 |
| Pixie          | JF937104 | Mycobacterium | K3 | 61147 | 100 | 67.3 |
| ShedlockHolmes | KR080206 | Mycobacterium | K3 | 61081 | 100 | 67.3 |
| TBond007       | KX683428 | Mycobacterium | K3 | 61145 | 97  | 67.3 |
| Chancellor     | MF140402 | Mycobacterium | K4 | 57697 | 94  | 68.0 |
| Cheetobro      | KJ944841 | Mycobacterium | K4 | 57253 | 92  | 68.0 |
| Fionnbharth    | JN831653 | Mycobacterium | K4 | 58076 | 94  | 68.0 |
| Mitti          | KY087992 | Mycobacterium | K4 | 57895 | 94  | 68.0 |
| SamScheppers   | MH051258 | Mycobacterium | K4 | 58351 | 94  | 67.6 |
| Slarp          | KT361920 | Mycobacterium | K4 | 57256 | 92  | 68.0 |
| Taquito        | KX621007 | Mycobacterium | K4 | 58390 | 94  | 67.5 |
| Wintermute     | MF140435 | Mycobacterium | K4 | 58046 | 94  | 68.0 |
| AlleyCat       | MF185717 | Mycobacterium | K5 | 62112 | 99  | 65.3 |
| Collard        | MH651171 | Mycobacterium | K5 | 61395 | 94  | 65.6 |
| Edugator       | MF185719 | Mycobacterium | K5 | 63344 | 92  | 65.3 |
| Gengar         | KX636165 | Mycobacterium | K5 | 61626 | 95  | 65.0 |
| Guillsminger   | MF185720 | Mycobacterium | K5 | 63153 | 95  | 65.0 |

|                 |          |               |    |       |     |      |
|-----------------|----------|---------------|----|-------|-----|------|
| Kratio          | KM923971 | Mycobacterium | K5 | 62738 | 99  | 65.7 |
| Larva           | JN243855 | Mycobacterium | K5 | 62991 | 97  | 65.3 |
| Leston          | MH051255 | Mycobacterium | K5 | 61808 | 94  | 64.9 |
| OkiRoe          | KJ567042 | Mycobacterium | K5 | 62661 | 96  | 64.9 |
| Omicron         | KM363596 | Mycobacterium | K5 | 61511 | 95  | 64.0 |
| Paola           | MG962374 | Mycobacterium | K5 | 61535 | 92  | 65.0 |
| Rando14         | MH697592 | Mycobacterium | K5 | 59925 | 91  | 64.3 |
| Thyatira        | MH576966 | Mycobacterium | K5 | 63874 | 96  | 64.6 |
| Waterfoul       | KX585251 | Mycobacterium | K5 | 61248 | 94  | 64.9 |
| Amgine          | MF324915 | Mycobacterium | K6 | 62236 | 97  | 66.4 |
| Amohnition      | MF140398 | Mycobacterium | K6 | 61761 | 94  | 67.2 |
| Cain            | MF324913 | Mycobacterium | K6 | 60813 | 100 | 66.3 |
| DarthP          | MF140406 | Mycobacterium | K6 | 61594 | 94  | 67.2 |
| Hammy           | KY087993 | Mycobacterium | K6 | 61812 | 94  | 67.2 |
| Krueger         | MF324914 | Mycobacterium | K6 | 60321 | 100 | 66.5 |
| PhelpsODU       | MF324909 | Mycobacterium | K6 | 56580 | 90  | 66.1 |
| Phrank          | MF324912 | Mycobacterium | K6 | 61109 | 101 | 66.2 |
| SirPhilip       | MF324911 | Mycobacterium | K6 | 61882 | 97  | 66.7 |
| Unicorn         | MF324908 | Mycobacterium | K6 | 61208 | 100 | 66.2 |
| Aminay          | MH509442 | Mycobacterium | K7 | 60430 | 105 | 67.8 |
| Appletree2      | MF185726 | Mycobacterium | L1 | 73808 | 125 | 58.9 |
| JoeDirt         | JF704108 | Mycobacterium | L1 | 74914 | 126 | 58.8 |
| LeBron          | HM152763 | Mycobacterium | L1 | 73453 | 123 | 58.8 |
| UPIE            | JF704113 | Mycobacterium | L1 | 73784 | 122 | 58.8 |
| Wamburgrxpress  | MH744425 | Mycobacterium | L1 | 74392 | 128 | 58.8 |
| Archie          | KT591489 | Mycobacterium | L2 | 76271 | 128 | 58.7 |
| BigCheese       | MH834600 | Mycobacterium | L2 | 72810 | 126 | 58.9 |
| Breezona        | KC691254 | Mycobacterium | L2 | 76652 | 132 | 58.9 |
| Crossroads      | KF024731 | Mycobacterium | L2 | 76129 | 133 | 58.9 |
| Faith1          | JF744988 | Mycobacterium | L2 | 75960 | 129 | 58.9 |
| Finemlucis      | MF185728 | Mycobacterium | L2 | 77031 | 131 | 58.9 |
| Gardann         | KX507361 | Mycobacterium | L2 | 76012 | 126 | 58.9 |
| GuuelaD         | MF324910 | Mycobacterium | L2 | 76315 | 129 | 58.9 |
| LilDestine      | MH779511 | Mycobacterium | L2 | 75440 | 129 | 58.9 |
| Loadrie         | KU997639 | Mycobacterium | L2 | 76492 | 133 | 59.0 |
| Miley16         | MF185730 | Mycobacterium | L2 | 76653 | 132 | 58.9 |
| MkaliMitinis3   | KU234099 | Mycobacterium | L2 | 75844 | 132 | 58.9 |
| Nicholasp3      | MF140422 | Mycobacterium | L2 | 75822 | 130 | 58.9 |
| Rumpelstiltskin | JN680858 | Mycobacterium | L2 | 69279 | 110 | 58.9 |
| Wilder          | KX580962 | Mycobacterium | L2 | 75806 | 130 | 58.9 |
| Winky           | KC661276 | Mycobacterium | L2 | 76653 | 132 | 58.9 |
| Zakai           | KX580961 | Mycobacterium | L2 | 76363 | 132 | 58.9 |
| Clautastrophe   | MF140405 | Mycobacterium | L3 | 72055 | 122 | 59.2 |
| Kingsolomon     | MF140413 | Mycobacterium | L3 | 69537 | 110 | 59.1 |
| Krypton555      | MF140414 | Mycobacterium | L3 | 76075 | 130 | 59.3 |
| Lolly9          | KT281791 | Mycobacterium | L3 | 75816 | 130 | 59.3 |
| Lumos           | KT372003 | Mycobacterium | L3 | 75586 | 128 | 59.3 |
| Nicholas        | MF140421 | Mycobacterium | L3 | 70413 | 112 | 59.2 |
| Samty           | MH727559 | Mycobacterium | L3 | 75307 | 127 | 59.3 |

|                |          |               |    |       |     |      |
|----------------|----------|---------------|----|-------|-----|------|
| Snenia         | KT281794 | Mycobacterium | L3 | 75626 | 130 | 59.3 |
| Whirlwind      | KF024725 | Mycobacterium | L3 | 76050 | 128 | 59.3 |
| Bromden        | MH576973 | Mycobacterium | L4 | 70183 | 118 | 58.2 |
| Bongo          | JN699628 | Mycobacterium | M1 | 80228 | 132 | 61.6 |
| Bricole        | KT591491 | Mycobacterium | M1 | 81128 | 139 | 61.6 |
| IPhane7        | MH697587 | Mycobacterium | M1 | 81036 | 137 | 61.6 |
| PegLeg         | KC900379 | Mycobacterium | M1 | 80955 | 138 | 61.5 |
| GardenSalsa    | KY783914 | Mycobacterium | M2 | 80309 | 142 | 60.9 |
| GenevaB15      | MF319184 | Mycobacterium | M2 | 80123 | 144 | 60.8 |
| MrMagoo        | KY223999 | Mycobacterium | M2 | 84303 | 155 | 60.8 |
| Rey            | JF937105 | Mycobacterium | M2 | 83724 | 153 | 60.9 |
| Aggie          | MH697576 | Mycobacterium | N  | 44333 | 67  | 66.5 |
| Andies         | MG099936 | Mycobacterium | N  | 43779 | 65  | 66.2 |
| Butters        | KC576783 | Mycobacterium | N  | 41491 | 66  | 65.8 |
| Carcharodon    | KM588359 | Mycobacterium | N  | 43680 | 71  | 66.2 |
| Charlie        | JN256079 | Mycobacterium | N  | 43036 | 68  | 66.3 |
| Gex            | MH697585 | Mycobacterium | N  | 43697 | 71  | 66.3 |
| MichelleMyBell | KF986246 | Mycobacterium | N  | 42240 | 70  | 66.0 |
| Panchino       | KU935727 | Mycobacterium | N  | 43516 | 66  | 65.9 |
| PhancyPhin     | KX756439 | Mycobacterium | N  | 42454 | 69  | 66.1 |
| Philonius      | MG099948 | Mycobacterium | N  | 43886 | 72  | 66.5 |
| Phrann         | KU935731 | Mycobacterium | N  | 44872 | 67  | 66.3 |
| Pipsqueaks     | KU935730 | Mycobacterium | N  | 43679 | 73  | 66.3 |
| Redi           | JN624851 | Mycobacterium | N  | 42594 | 69  | 66.1 |
| Rubeelu        | MH399787 | Mycobacterium | N  | 41491 | 66  | 65.8 |
| Silvafighter   | MH316570 | Mycobacterium | N  | 43243 | 74  | 66.3 |
| SkinnyPete     | KU935729 | Mycobacterium | N  | 43478 | 67  | 66.4 |
| Tapioca        | MH697593 | Mycobacterium | N  | 44205 | 70  | 66.1 |
| Xeno           | KU935728 | Mycobacterium | N  | 42395 | 69  | 66.8 |
| Xerxes         | KU935726 | Mycobacterium | N  | 43698 | 72  | 66.3 |
| Catdawg        | KF017002 | Mycobacterium | O  | 72108 | 128 | 65.4 |
| Corndog        | AY129335 | Mycobacterium | O  | 69777 | 122 | 65.4 |
| Dylan          | KF024730 | Mycobacterium | O  | 69815 | 121 | 65.4 |
| Familton       | MG099943 | Mycobacterium | O  | 71807 | 129 | 65.4 |
| Firecracker    | JN698993 | Mycobacterium | O  | 71341 | 128 | 65.5 |
| JangDynasty    | MG872838 | Mycobacterium | O  | 70883 | 124 | 65.4 |
| Ryadel         | MH590592 | Mycobacterium | O  | 72658 | 132 | 65.2 |
| SchoolBus      | MH020246 | Mycobacterium | O  | 71651 | 128 | 65.4 |
| YungJamal      | KJ829260 | Mycobacterium | O  | 70214 | 124 | 65.3 |
| Zakhe101       | KT281796 | Mycobacterium | O  | 69653 | 123 | 65.5 |
| Arib1          | MF919492 | Mycobacterium | P1 | 46732 | 78  | 67.5 |
| Bartholomew    | MF140399 | Mycobacterium | P1 | 46484 | 77  | 67.2 |
| BigNuz         | JN412591 | Mycobacterium | P1 | 48984 | 82  | 66.7 |
| Bogie          | MF133446 | Mycobacterium | P1 | 48639 | 81  | 66.9 |
| Brusacoram     | KT347313 | Mycobacterium | P1 | 47618 | 78  | 67.0 |
| Donovan        | KF841477 | Mycobacterium | P1 | 47162 | 78  | 67.2 |
| Fishburne      | KC691256 | Mycobacterium | P1 | 47109 | 77  | 67.3 |
| Jebeks         | JN572061 | Mycobacterium | P1 | 45580 | 75  | 67.3 |
| Ksquared       | MF281061 | Mycobacterium | P1 | 48699 | 80  | 67.1 |

|             |          |               |           |       |     |      |
|-------------|----------|---------------|-----------|-------|-----|------|
| Majeke      | MF472894 | Mycobacterium | P1        | 47612 | 81  | 67.4 |
| Malithi     | KP027200 | Mycobacterium | P1        | 46869 | 79  | 67.1 |
| Nazo        | KX641262 | Mycobacterium | P1        | 48870 | 83  | 66.8 |
| Phayonce    | KR080195 | Mycobacterium | P1        | 49203 | 77  | 66.7 |
| Shipwreck   | KU985090 | Mycobacterium | P1        | 48670 | 81  | 66.9 |
| StevieRay   | MF373843 | Mycobacterium | P1        | 48815 | 81  | 66.9 |
| Thespis     | MG198785 | Mycobacterium | P1        | 47618 | 78  | 67.0 |
| Tortellini  | KX648391 | Mycobacterium | P2        | 49658 | 76  | 65.8 |
| Xavia       | MH230879 | Mycobacterium | P3        | 49808 | 71  | 65.9 |
| Amochick    | MH697577 | Mycobacterium | Q         | 54145 | 86  | 67.4 |
| Evanescence | KT454972 | Mycobacterium | Q         | 53746 | 85  | 67.4 |
| Gancho      | MH727549 | Mycobacterium | Q         | 54125 | 86  | 67.5 |
| Giles       | EU203571 | Mycobacterium | Q         | 53746 | 78  | 67.4 |
| HH92        | KJ538722 | Mycobacterium | Q         | 53746 | 84  | 67.4 |
| Kinbote     | KT222940 | Mycobacterium | Q         | 53746 | 84  | 67.4 |
| LilHazelnut | MF919517 | Mycobacterium | Q         | 53746 | 85  | 67.5 |
| OBUpide     | KT246485 | Mycobacterium | Q         | 53790 | 84  | 67.5 |
| Nilo        | MH001447 | Mycobacterium | R         | 71752 | 102 | 56.0 |
| Papyrus     | KF416342 | Mycobacterium | R         | 70657 | 100 | 56.0 |
| Send513     | JF704112 | Mycobacterium | R         | 71547 | 98  | 56.0 |
| Weiss13     | KT591076 | Mycobacterium | R         | 71436 | 100 | 55.9 |
| Zenon       | KY969628 | Mycobacterium | R         | 71726 | 102 | 56.0 |
| Gattaca     | KX159477 | Mycobacterium | S         | 65237 | 115 | 63.3 |
| LittleLaf   | MH727553 | Mycobacterium | S         | 64834 | 112 | 63.4 |
| Marvin      | JF704100 | Mycobacterium | S         | 65100 | 107 | 63.4 |
| MosMoris    | KJ538721 | Mycobacterium | S         | 65243 | 111 | 63.4 |
| Tesla       | MG757167 | Mycobacterium | S         | 64625 | 111 | 63.5 |
| VasuNzinga  | MH727562 | Mycobacterium | S         | 64911 | 113 | 63.4 |
| Dori        | JN698995 | Mycobacterium | Singleton | 64613 | 94  | 66.0 |
| DS6A        | JN698994 | Mycobacterium | Singleton | 60588 | 97  | 68.4 |
| Kumao       | MG009575 | Mycobacterium | Singleton | 70373 | 115 | 62.1 |
| MooMoo      | MH001449 | Mycobacterium | Singleton | 55178 | 97  | 62.0 |
| Sparky      | KM083128 | Mycobacterium | Singleton | 63334 | 91  | 65.2 |
| Bernal13    | KJ510413 | Mycobacterium | T         | 42392 | 60  | 66.2 |
| Mendokysei  | MG925349 | Mycobacterium | T         | 43511 | 65  | 66.4 |
| Nairb       | MH001451 | Mycobacterium | T         | 42393 | 59  | 66.2 |
| RonRayGun   | KM591905 | Mycobacterium | T         | 42596 | 61  | 66.1 |
| ZenTime222  | MF155936 | Mycobacterium | T         | 43344 | 67  | 66.0 |
| Madrugua    | KR997933 | Mycobacterium | U         | 69377 | 106 | 50.4 |
| Patience    | JN412589 | Mycobacterium | U         | 70506 | 110 | 50.3 |
| Cosmo       | KP027195 | Mycobacterium | V         | 78229 | 148 | 56.8 |
| EniyanLRS   | KY385381 | Mycobacterium | V         | 78536 | 137 | 56.9 |
| Wildcat     | DQ398052 | Mycobacterium | V         | 78296 | 148 | 56.9 |
| Jeon        | MH001450 | Mycobacterium | W         | 60908 | 85  | 67.6 |
| Megabear    | MH001446 | Mycobacterium | W         | 60579 | 89  | 67.5 |
| Taptic      | KY130461 | Mycobacterium | W         | 60973 | 92  | 67.4 |
| Gaia        | KJ567043 | Mycobacterium | X         | 90460 | 179 | 56.8 |
| Bipper      | KU728633 | Mycobacterium | Y         | 77832 | 135 | 67.3 |
| 32HC        | KJ028219 | Mycobacterium | Z         | 50781 | 86  | 65.7 |

|             |           |                   |    |       |    |      |
|-------------|-----------|-------------------|----|-------|----|------|
| Rem711      | MG770216  | Mycobacterium     | Z  | 50832 | 85 | 66.2 |
| Aquarius    | MF919491  | Propionibacterium | BU | 30112 | 48 | 54.5 |
| ATCC29399BC | JX262225  | Propionibacterium | BU | 29516 | 46 | 54.0 |
| ATCC29399BT | JX262224  | Propionibacterium | BU | 29516 | 46 | 54.0 |
| Attacne     | KR337651  | Propionibacterium | BU | 28876 | 45 | 54.7 |
| BruceLethal | KR347352  | Propionibacterium | BU | 29249 | 44 | 54.0 |
| DrParker    | MF919505  | Propionibacterium | BU | 29742 | 45 | 54.6 |
| Enoki       | KR347353  | Propionibacterium | BU | 29347 | 45 | 54.6 |
| Keiki       | KR337649  | Propionibacterium | BU | 29339 | 45 | 54.0 |
| Kubed       | KR337645  | Propionibacterium | BU | 29461 | 44 | 54.5 |
| Lauchelly   | KR337650  | Propionibacterium | BU | 29517 | 45 | 53.9 |
| Leviosa     | MF919515  | Propionibacterium | BU | 29451 | 44 | 53.7 |
| LilBandit   | MF919516  | Propionibacterium | BU | 29041 | 45 | 54.0 |
| MEAK        | MF919522  | Propionibacterium | BU | 29223 | 44 | 54.0 |
| Moyashi     | KR347354  | Propionibacterium | BU | 29254 | 44 | 54.6 |
| MrAK        | KR337643  | Propionibacterium | BU | 29726 | 46 | 54.4 |
| Ouroboros   | KR337654  | Propionibacterium | BU | 29506 | 45 | 53.9 |
| P1.1        | JX262223  | Propionibacterium | BU | 29348 | 45 | 54.4 |
| P100.1      | JX262222  | Propionibacterium | BU | 29612 | 47 | 54.1 |
| P100A       | JX262221  | Propionibacterium | BU | 29505 | 45 | 53.8 |
| P100D       | JX262220  | Propionibacterium | BU | 29506 | 47 | 53.8 |
| P101A       | JX262217  | Propionibacterium | BU | 29574 | 47 | 54.1 |
| P104A       | JX262218  | Propionibacterium | BU | 29371 | 45 | 54.0 |
| P105        | JX262219  | Propionibacterium | BU | 29202 | 45 | 54.2 |
| P14.4       | JX262216  | Propionibacterium | BU | 29729 | 47 | 54.1 |
| P9.1        | JX262215  | Propionibacterium | BU | 29214 | 45 | 54.1 |
| PA6         | DQ431235  | Propionibacterium | BU | 29739 | 44 | 54.0 |
| PAD20       | NC_015454 | Propionibacterium | BU | 29074 | 45 | 54.1 |
| PAS50       | NC_015453 | Propionibacterium | BU | 29017 | 46 | 54.0 |
| PHL010M04   | NC_022336 | Propionibacterium | BU | 29511 | 45 | 54.0 |
| PHL037M02   | NC_022339 | Propionibacterium | BU | 29443 | 45 | 53.8 |
| PHL060L00   | NC_022338 | Propionibacterium | BU | 29514 | 46 | 54.0 |
| PHL067M10   | NC_022335 | Propionibacterium | BU | 29377 | 45 | 54.3 |
| PHL071N05   | NC_022337 | Propionibacterium | BU | 29467 | 45 | 53.9 |
| PHL111M01   | NC_022342 | Propionibacterium | BU | 29140 | 45 | 54.3 |
| PHL112N00   | NC_022334 | Propionibacterium | BU | 29266 | 46 | 54.5 |
| PHL113M01   | NC_022341 | Propionibacterium | BU | 29200 | 44 | 54.1 |
| PHL114L00   | NC_022340 | Propionibacterium | BU | 29464 | 46 | 54.2 |
| Pirate      | KR337653  | Propionibacterium | BU | 29328 | 44 | 54.1 |
| Procrass1   | KR337644  | Propionibacterium | BU | 29347 | 45 | 54.0 |
| QueenBey    | KR347355  | Propionibacterium | BU | 29338 | 43 | 54.1 |
| SKKY        | KR337648  | Propionibacterium | BU | 29594 | 47 | 54.6 |
| Solid       | KR337647  | Propionibacterium | BU | 29440 | 45 | 53.9 |
| Stormborn   | KR337652  | Propionibacterium | BU | 29330 | 46 | 53.8 |
| Supernova   | MF919533  | Propionibacterium | BU | 29217 | 45 | 54.4 |
| Wizzo       | KR337646  | Propionibacterium | BU | 29463 | 44 | 54.4 |
| Anatole     | KX620748  | Propionibacterium | BV | 35284 | 55 | 64.4 |
| B3          | KX620749  | Propionibacterium | BV | 35948 | 57 | 64.4 |
| E1          | KX620752  | Propionibacterium | BV | 35209 | 55 | 64.4 |

|               |           |                   |           |        |     |      |
|---------------|-----------|-------------------|-----------|--------|-----|------|
| B22           | KX620750  | Propionibacterium | BW        | 37219  | 61  | 65.5 |
| Doucette      | KX620751  | Propionibacterium | BW        | 37429  | 61  | 65.6 |
| E6            | KX620753  | Propionibacterium | BW        | 38067  | 60  | 65.2 |
| G4            | KX620754  | Propionibacterium | BW        | 38555  | 69  | 65.7 |
| PFR1          | NC_031076 | Propionibacterium | BX        | 38071  | 56  | 64.8 |
| PFR2          | NC_031108 | Propionibacterium | BX        | 39640  | 58  | 65.0 |
| B5            | NC_003460 | Propionibacterium | Singleton | 5804   | 10  | 64.3 |
| Alatin        | MF324905  | Rhodococcus       | CA        | 46673  | 65  | 58.7 |
| Alpacados     | MH271291  | Rhodococcus       | CA        | 46493  | 66  | 58.9 |
| AngryOrchard  | KY549153  | Rhodococcus       | CA        | 46597  | 65  | 58.8 |
| AppleCloud    | MF324903  | Rhodococcus       | CA        | 46389  | 64  | 58.7 |
| BobbyDazzler  | KY549154  | Rhodococcus       | CA        | 46641  | 65  | 58.8 |
| Bonanza       | MF537628  | Rhodococcus       | CA        | 46932  | 66  | 58.8 |
| Bradshaw      | MH271293  | Rhodococcus       | CA        | 46606  | 65  | 58.6 |
| Bryce         | MH271294  | Rhodococcus       | CA        | 46347  | 65  | 58.8 |
| CosmicSans    | KT372002  | Rhodococcus       | CA        | 46596  | 66  | 58.5 |
| Erik          | MH271297  | Rhodococcus       | CA        | 46429  | 66  | 58.5 |
| Gollum        | MH271299  | Rhodococcus       | CA        | 46535  | 66  | 58.6 |
| Harlequin     | KX611788  | Rhodococcus       | CA        | 46383  | 66  | 58.8 |
| Hiro          | MF324898  | Rhodococcus       | CA        | 46854  | 65  | 58.7 |
| Jester        | MF373842  | Rhodococcus       | CA        | 46314  | 65  | 58.7 |
| Krishelle     | MF324902  | Rhodococcus       | CA        | 46985  | 67  | 58.5 |
| Lillie        | KT990218  | Rhodococcus       | CA        | 46596  | 66  | 58.6 |
| Naiad         | MF324901  | Rhodococcus       | CA        | 46619  | 65  | 58.6 |
| Nancinator    | MH271306  | Rhodococcus       | CA        | 45936  | 65  | 58.6 |
| Natosaleda    | KX550082  | Rhodococcus       | CA        | 46527  | 65  | 58.6 |
| Partridge     | KX712237  | Rhodococcus       | CA        | 46962  | 66  | 58.8 |
| Phrankenstein | MH271309  | Rhodococcus       | CA        | 46540  | 66  | 58.6 |
| Rasputin      | MH271311  | Rhodococcus       | CA        | 46568  | 66  | 58.8 |
| RER2          | JN116827  | Rhodococcus       | CA        | 46586  | 66  | 58.6 |
| RexFury       | MF324904  | Rhodococcus       | CA        | 46627  | 65  | 58.6 |
| RGL3          | JN116826  | Rhodococcus       | CA        | 48072  | 66  | 62.7 |
| Rhodalya      | KT375356  | Rhodococcus       | CA        | 46596  | 66  | 58.5 |
| Shuman        | MH316569  | Rhodococcus       | CA        | 46544  | 67  | 58.6 |
| StCroix       | MF324900  | Rhodococcus       | CA        | 46619  | 65  | 58.6 |
| Swann         | MH271314  | Rhodococcus       | CA        | 46596  | 66  | 58.6 |
| Takoda        | MH271315  | Rhodococcus       | CA        | 46807  | 67  | 58.7 |
| TWAMP         | KT959213  | Rhodococcus       | CA        | 46596  | 66  | 58.5 |
| UhSalsa       | MH271319  | Rhodococcus       | CA        | 46539  | 66  | 58.6 |
| Yogi          | KX712236  | Rhodococcus       | CA        | 46930  | 66  | 58.8 |
| Yoncess       | MF189179  | Rhodococcus       | CA        | 46353  | 65  | 58.8 |
| Grayson       | MH153812  | Rhodococcus       | CB        | 131801 | 275 | 41.2 |
| Peregrin      | MH153807  | Rhodococcus       | CB        | 133006 | 273 | 41.4 |
| Weasels2      | KX774321  | Rhodococcus       | CB        | 134973 | 283 | 41.3 |
| Pepy6         | NC_023735 | Rhodococcus       | CC        | 76797  | 107 | 53.4 |
| Poco6         | NC_023694 | Rhodococcus       | CC        | 78064  | 107 | 53.3 |
| ChewyVIII     | KX557288  | Rhodococcus       | Singleton | 69165  | 95  | 61.8 |
| DocB7         | NC_023706 | Rhodococcus       | Singleton | 75772  | 105 | 56.7 |
| E3            | HM114277  | Rhodococcus       | Singleton | 142563 | 220 | 67.5 |

|                |           |              |           |        |     |      |
|----------------|-----------|--------------|-----------|--------|-----|------|
| Finch          | MG962366  | Rhodococcus  | Singleton | 138896 | 228 | 63.1 |
| Jace           | MH153804  | Rhodococcus  | Singleton | 53912  | 93  | 67.0 |
| Pine5          | NC_023722 | Rhodococcus  | Singleton | 59231  | 84  | 67.1 |
| REQ1           | NC_016655 | Rhodococcus  | Singleton | 51342  | 85  | 66.3 |
| REQ2           | NC_016652 | Rhodococcus  | Singleton | 49330  | 82  | 65.4 |
| REQ3           | NC_016654 | Rhodococcus  | Singleton | 39474  | 60  | 65.9 |
| RRH1           | NC_016651 | Rhodococcus  | Singleton | 14270  | 20  | 68.4 |
| Trina          | MF668286  | Rhodococcus  | Singleton | 139262 | 252 | 44.7 |
| SPB78          | N/A       | Streptomyces | BA        | 51282  | 77  | 71.2 |
| Sros11         | N/A       | Streptomyces | BA        | 48399  | 77  | 70.3 |
| VWB            | AY320035  | Streptomyces | BA        | 49220  | 74  | 71.1 |
| phiBT1         | AJ550940  | Streptomyces | BB1       | 41831  | 55  | 62.8 |
| phiC31         | AJ006589  | Streptomyces | BB1       | 41491  | 53  | 63.6 |
| TG1            | JX182372  | Streptomyces | BB1       | 40474  | 54  | 64.6 |
| Mojorita       | KY092482  | Streptomyces | BC1       | 38496  | 56  | 72.5 |
| Picard         | KY092480  | Streptomyces | BC1       | 39522  | 56  | 72.6 |
| Shyg           | N/A       | Streptomyces | BC1       | 39945  | 58  | 70.0 |
| SV1            | JX182371  | Streptomyces | BC1       | 37612  | 55  | 72.7 |
| ToastyFinz     | KY676784  | Streptomyces | BC1       | 39693  | 52  | 72.5 |
| Darolandstone  | MH825699  | Streptomyces | BC2       | 40725  | 55  | 72.3 |
| Raleigh        | KY092484  | Streptomyces | BC2       | 40785  | 53  | 71.8 |
| Bioscum        | KY092483  | Streptomyces | BC3       | 37830  | 54  | 72.3 |
| Ididsumtinwong | KY092479  | Streptomyces | BC3       | 37817  | 55  | 72.4 |
| PapayaSalad    | KY092481  | Streptomyces | BC3       | 38411  | 54  | 72.6 |
| Aaronocolus    | KT124227  | Streptomyces | BD1       | 49562  | 73  | 66.2 |
| BeardedLady    | MF541403  | Streptomyces | BD1       | 49941  | 74  | 66.2 |
| Brataylor      | KX507345  | Streptomyces | BD1       | 51067  | 77  | 65.7 |
| BryanRecycles  | MF541404  | Streptomyces | BD1       | 50066  | 75  | 65.9 |
| Caliburn       | KT152029  | Streptomyces | BD1       | 49949  | 72  | 66.2 |
| Celeste        | MF541405  | Streptomyces | BD1       | 50536  | 76  | 65.8 |
| Danzina        | KT124228  | Streptomyces | BD1       | 50773  | 76  | 65.7 |
| Dattran        | MF541406  | Streptomyces | BD1       | 50976  | 77  | 65.8 |
| Eddasa         | MH171096  | Streptomyces | BD1       | 50605  | 76  | 65.9 |
| Esperer        | MF541407  | Streptomyces | BD1       | 49908  | 74  | 66.2 |
| Goby           | MH171097  | Streptomyces | BD1       | 51393  | 76  | 65.8 |
| Godpower       | KX507344  | Streptomyces | BD1       | 50701  | 76  | 65.7 |
| Hydra          | KT124229  | Streptomyces | BD1       | 50727  | 76  | 66.2 |
| Izzy           | KT184390  | Streptomyces | BD1       | 50113  | 75  | 65.9 |
| Jash           | MF541408  | Streptomyces | BD1       | 50066  | 75  | 65.9 |
| Lannister      | KT184391  | Streptomyces | BD1       | 50165  | 73  | 65.7 |
| Lika           | KC700556  | Streptomyces | BD1       | 51252  | 75  | 65.8 |
| Lorelei        | KX507343  | Streptomyces | BD1       | 50558  | 75  | 65.8 |
| Maneekul       | MH171095  | Streptomyces | BD1       | 51612  | 73  | 65.7 |
| Nabi           | MH171094  | Streptomyces | BD1       | 51127  | 76  | 65.8 |
| Nanodon        | KX344445  | Streptomyces | BD1       | 50082  | 75  | 65.7 |
| Oliynyk        | MF541409  | Streptomyces | BD1       | 49976  | 75  | 65.9 |
| Ozzie          | MF541410  | Streptomyces | BD1       | 49961  | 73  | 66.2 |
| OzzyJ          | MG757163  | Streptomyces | BD1       | 51464  | 75  | 65.7 |
| Rana           | MH171093  | Streptomyces | BD1       | 50980  | 76  | 65.8 |



|                |          |              |     |        |     |      |
|----------------|----------|--------------|-----|--------|-----|------|
| Sujidade       | KC700557 | Streptomyces | BD1 | 51552  | 77  | 65.7 |
| Toma           | MH171098 | Streptomyces | BD1 | 51396  | 76  | 65.8 |
| Zemlya         | KC700558 | Streptomyces | BD1 | 51077  | 76  | 65.7 |
| Amethyst       | MF766044 | Streptomyces | BD2 | 49372  | 79  | 67.2 |
| Daudau         | MF766045 | Streptomyces | BD2 | 50602  | 83  | 67.1 |
| Diane          | MF766046 | Streptomyces | BD2 | 50483  | 79  | 66.7 |
| ELB20          | JX262376 | Streptomyces | BD2 | 51160  | 81  | 67.0 |
| Haizum         | MH590601 | Streptomyces | BD2 | 50660  | 81  | 66.8 |
| Hank144        | MH669004 | Streptomyces | BD2 | 50547  | 78  | 66.3 |
| Omar           | MG593802 | Streptomyces | BD2 | 49299  | 80  | 67.3 |
| Paedore        | MH001460 | Streptomyces | BD2 | 52743  | 84  | 67.0 |
| R4             | JX182370 | Streptomyces | BD2 | 51071  | 86  | 67.0 |
| SqueakyClean   | MF766047 | Streptomyces | BD2 | 50837  | 78  | 67.0 |
| Tefunt         | MF766048 | Streptomyces | BD2 | 50574  | 81  | 66.8 |
| Thestral       | MH651190 | Streptomyces | BD2 | 52628  | 82  | 67.7 |
| TrvxScott      | MH669016 | Streptomyces | BD2 | 52600  | 81  | 67.8 |
| Alsaber        | MG298964 | Streptomyces | BD3 | 48803  | 76  | 65.9 |
| Amela          | KT186228 | Streptomyces | BD3 | 49452  | 75  | 65.6 |
| phiCAM         | JX889246 | Streptomyces | BD3 | 50348  | 72  | 65.6 |
| Verse          | KT186229 | Streptomyces | BD3 | 49483  | 75  | 65.6 |
| Yosif          | MH248947 | Streptomyces | BD3 | 50129  | 78  | 66.1 |
| phiHau3        | JX182369 | Streptomyces | BD4 | 50255  | 77  | 67.8 |
| StrepC         | N/A      | Streptomyces | BD5 | 51580  | 77  | 67.4 |
| Jay2Jay        | KM652554 | Streptomyces | BE1 | 133531 | 235 | 49.5 |
| Mildred21      | MF155946 | Streptomyces | BE1 | 131976 | 234 | 49.5 |
| NootNoot       | MF347636 | Streptomyces | BE1 | 131086 | 221 | 50.2 |
| Paraddles      | MF347637 | Streptomyces | BE1 | 133486 | 216 | 50.1 |
| Peebs          | MF347638 | Streptomyces | BE1 | 133047 | 226 | 50.1 |
| Samisti12      | MF347639 | Streptomyces | BE1 | 133710 | 226 | 49.9 |
| Sushi23        | MF358542 | Streptomyces | BE1 | 133917 | 229 | 50.0 |
| Warpy          | MF358541 | Streptomyces | BE1 | 132996 | 233 | 49.6 |
| Karimac        | MH590599 | Streptomyces | BE2 | 131909 | 241 | 49.4 |
| LukeCage       | MH590597 | Streptomyces | BE2 | 133195 | 248 | 49.0 |
| Starbow        | MH576964 | Streptomyces | BE2 | 131427 | 238 | 49.5 |
| StarPlatinum   | MH576965 | Streptomyces | BE2 | 133886 | 251 | 49.5 |
| Wofford        | MH576968 | Streptomyces | BE2 | 133007 | 236 | 47.7 |
| Yaboi          | MH727564 | Streptomyces | BE2 | 131250 | 242 | 49.3 |
| FlowerPower    | MH155868 | Streptomyces | BF  | 46133  | 66  | 60.7 |
| HaugeAnator    | MG663582 | Streptomyces | BF  | 46135  | 64  | 59.6 |
| Immanuel3      | MG518520 | Streptomyces | BF  | 46094  | 62  | 59.6 |
| Manuel         | MG518519 | Streptomyces | BF  | 45177  | 63  | 60.1 |
| Percastrophe   | MG663583 | Streptomyces | BF  | 45999  | 64  | 59.7 |
| Romero         | MG663584 | Streptomyces | BF  | 46079  | 64  | 59.7 |
| ToriToki       | MG663585 | Streptomyces | BF  | 46077  | 64  | 59.7 |
| WRightOn       | MG515223 | Streptomyces | BF  | 45221  | 64  | 60.3 |
| ZooBear        | MG663586 | Streptomyces | BF  | 46135  | 64  | 59.7 |
| Abt2graduatex2 | MF975638 | Streptomyces | BG  | 57385  | 71  | 69.2 |
| BabyGotBac     | KY365739 | Streptomyces | BG  | 57165  | 72  | 69.2 |
| BayC           | MH178381 | Streptomyces | BG  | 57243  | 71  | 69.2 |

|                |           |              |           |        |     |      |
|----------------|-----------|--------------|-----------|--------|-----|------|
| Maih           | KU189325  | Streptomyces | BG        | 57256  | 70  | 69.3 |
| Salete         | MH178382  | Streptomyces | BG        | 57243  | 71  | 69.2 |
| TP1604         | KP876466  | Streptomyces | BG        | 57168  | 71  | 69.2 |
| Xkcd426        | KU530220  | Streptomyces | BG        | 64477  | 78  | 68.8 |
| YDN12          | KP876465  | Streptomyces | BG        | 56528  | 70  | 69.2 |
| Crosby         | MH536815  | Streptomyces | BH        | 54036  | 82  | 68.3 |
| Henoccus       | MH229862  | Streptomyces | BH        | 55137  | 82  | 68.2 |
| JackieB        | MH229863  | Streptomyces | BH        | 54912  | 82  | 68.2 |
| LazerLemon     | MH229865  | Streptomyces | BH        | 54798  | 81  | 68.1 |
| Microdon       | MH825706  | Streptomyces | BH        | 53356  | 79  | 68.6 |
| UNTPL          | MH229864  | Streptomyces | BH        | 54495  | 81  | 68.3 |
| Bing           | MG757154  | Streptomyces | BI1       | 56341  | 87  | 59.4 |
| DrGrey         | MF467948  | Streptomyces | BI1       | 56076  | 82  | 59.5 |
| OlympicHelado  | KX670789  | Streptomyces | BI1       | 56189  | 88  | 59.5 |
| Rima           | KX670790  | Streptomyces | BI1       | 56168  | 87  | 59.6 |
| Spectropatronm | MF467949  | Streptomyces | BI1       | 55707  | 85  | 59.5 |
| HotFries       | MH155869  | Streptomyces | BI2       | 43699  | 57  | 60.9 |
| Moozy          | MH155872  | Streptomyces | BI2       | 43545  | 58  | 61.2 |
| RavenPuff      | MH155878  | Streptomyces | BI2       | 43709  | 59  | 60.9 |
| Scap1          | MF975637  | Streptomyces | BI2       | 43060  | 56  | 60.9 |
| LibertyBell    | MH669006  | Streptomyces | BI3       | 52733  | 79  | 59.1 |
| Rainydai       | MH155877  | Streptomyces | BI4       | 57623  | 91  | 58.1 |
| SendItCS       | MH155880  | Streptomyces | BI4       | 55993  | 86  | 58.2 |
| phiSASD1       | GQ379227  | Streptomyces | BJ        | 37068  | 44  | 66.3 |
| Annadreamy     | MH536811  | Streptomyces | BK1       | 125726 | 229 | 47.6 |
| Blueeyedbeauty | MH536814  | Streptomyces | BK1       | 130473 | 240 | 47.9 |
| Comrade        | MH651172  | Streptomyces | BK1       | 129015 | 229 | 47.1 |
| SparkleGoddess | MH590589  | Streptomyces | BK1       | 129742 | 232 | 47.1 |
| BillNye        | MG757153  | Streptomyces | BK2       | 127084 | 217 | 52.8 |
| AbbeyMikolon   | MG593800  | Streptomyces | BL        | 42551  | 59  | 66.8 |
| Nesbitt        | MH001457  | Streptomyces | BL        | 42446  | 58  | 66.8 |
| Rowa           | MG593803  | Streptomyces | BL        | 42890  | 62  | 61.2 |
| JustBecause    | MH744418  | Streptomyces | BM        | 184281 | 325 | 66.6 |
| Satis          | MH576962  | Streptomyces | BM        | 186702 | 325 | 66.7 |
| Wentworth      | MH019216  | Streptomyces | BN        | 68260  | 103 | 64.1 |
| Yara           | MH019215  | Streptomyces | BN        | 68671  | 105 | 63.9 |
| Attoomi        | MG593801  | Streptomyces | Singleton | 41872  | 53  | 69.7 |
| Chymera        | KU958700  | Streptomyces | Singleton | 34742  | 55  | 71.4 |
| Ibantik        | MH155870  | Streptomyces | Singleton | 56362  | 105 | 57.4 |
| Kromp          | MH744420  | Streptomyces | Singleton | 58268  | 95  | 71.4 |
| mu16           | N/A       | Streptomyces | Singleton | 38196  | 56  | 71.2 |
| phiSAV         | N/A       | Streptomyces | Singleton | 41529  | 61  | 67.2 |
| pZL12          | N/A       | Streptomyces | Singleton | 90435  | 112 | 69.5 |
| TJE1           | NC_019930 | Tetrasphaera | Singleton | 49219  | 66  | 57.7 |
| TPA2           | NC_015210 | Tsukamurella | Singleton | 61440  | 78  | 69.6 |
| TPA4           | KR053196  | Tsukamurella | Singleton | 56212  | 84  | 70.5 |

<sup>1</sup>Primary phage identifier at PhagesDB.org

<sup>2</sup>Genbank or RefSeq accession, if available

<sup>3</sup>Cluster or Subcluster designation at PhagesDB.org

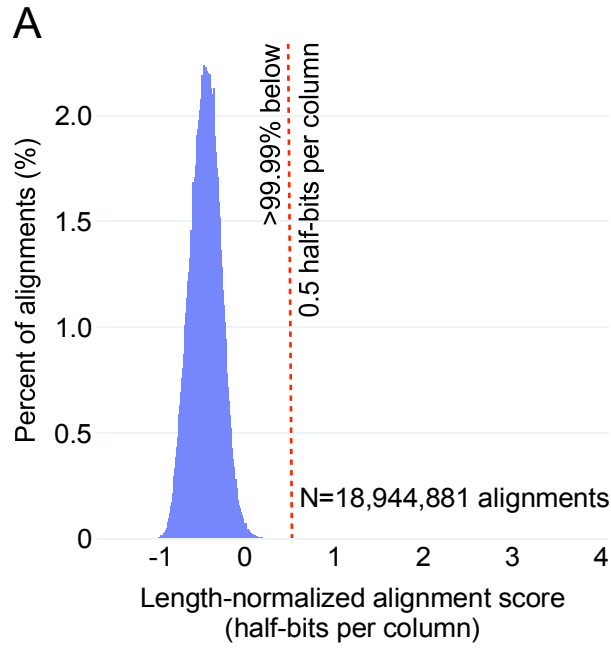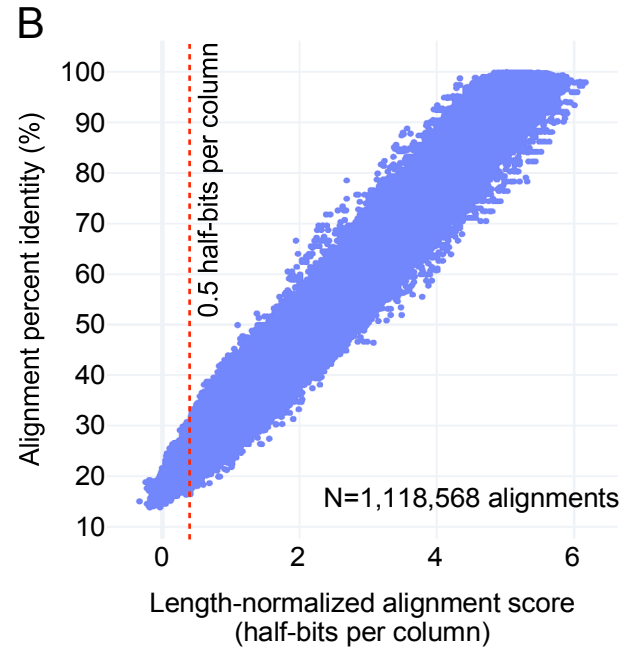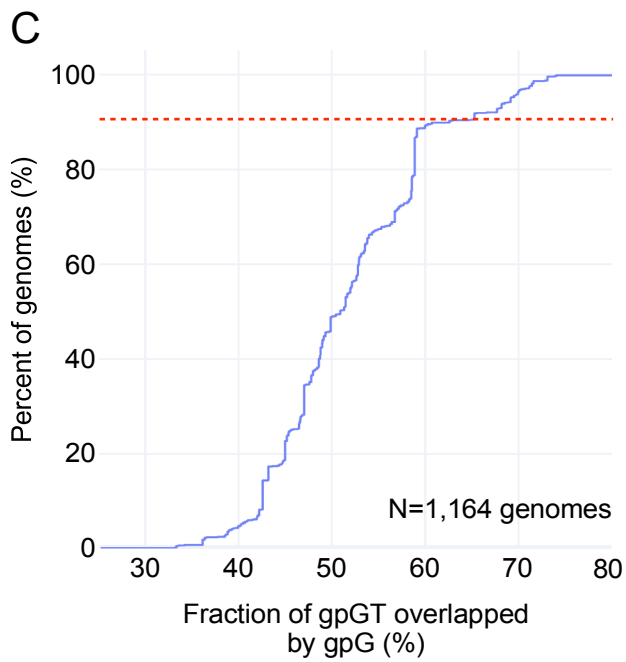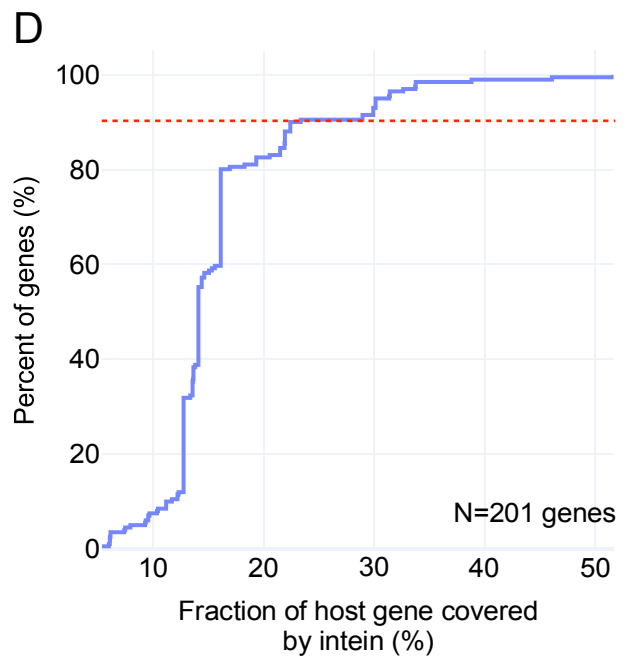

Figure S1
